# Supplementary material for: Activation of a Sweet Taste Receptor by Oleanane-Type Glycosides from Wisteria sinensis
Source: MDPI journal article supplement (doi:10.3390/molecules27227866), 2022-11-15
Supplement: s1 [file s1]

## Supplementary data

### **Activation of a sweet taste receptor by oleanane-type glycosides from *Wisteria sinensis***

Samir Hobloss<sup>1</sup>, Antoine Bruguère<sup>1</sup>, David Pertuit<sup>1</sup>, Tomofumi Miyamoto<sup>2</sup>, Chiaki Tanaka<sup>2</sup>, Christine Belloir<sup>1</sup>, Marie-Aleth Lacaille-Dubois<sup>1</sup>, Loïc Briand<sup>1</sup>, Anne-Claire Mitaine-Offer<sup>1,\*</sup>.

<sup>1</sup> Centre des Sciences du Goût et de l'Alimentation, CNRS, INRAE, Institut Agro, Université de Bourgogne Franche-Comté, 21000 Dijon, France

<sup>2</sup> Graduate School of Pharmaceutical Sciences, Kyushu University, Fukuoka, 812-8582, Japan

\* Correspondence: [anne-claire.offer@u-bourgogne.fr](mailto:anne-claire.offer@u-bourgogne.fr)

## Content

|                                                                         |    |
|-------------------------------------------------------------------------|----|
| Figure S1 - $^1\text{H}$ spectrum of compound 1 .....                   | 3  |
| Figure S2 - $^1\text{H}$ spectrum of compound 1 zoomed-in (a) .....     | 4  |
| Figure S3 - $^1\text{H}$ spectrum of compound 1 zoomed-in (b) .....     | 5  |
| Figure S4 - $^{13}\text{C}$ spectrum of compound 1.....                 | 6  |
| Figure S5 - $^{13}\text{C}$ spectrum of compound 1 zoomed-in (a) .....  | 7  |
| Figure S6 - $^{13}\text{C}$ spectrum of compound 1 zoomed-in (b) .....  | 8  |
| Figure S7 - $^{13}\text{C}$ spectrum of compound 1 zoomed-in (c) .....  | 9  |
| Figure S8 - HSQC spectrum of compound 1 .....                           | 10 |
| Figure S9 - HSQC spectrum of compound 1 zoomed-in (a).....              | 11 |
| Figure S10 - HSQC spectrum of compound 1 zoomed-in (b).....             | 12 |
| Figure S11 - HSQC spectrum of compound 1 zoomed-in (c).....             | 13 |
| Figure S12 - HMBC spectrum of compound-in 1 .....                       | 14 |
| Figure S13 - HMBC spectrum of compound 1 zoomed-in .....                | 15 |
| Figure S14 - COSY spectrum of compound 1.....                           | 16 |
| Figure S15 - COSY spectrum of compound 1 zoomed-in (a) .....            | 17 |
| Figure S16 - COSY spectrum of compound 1 zoomed-in (b) .....            | 18 |
| Figure S17 - ROESY spectrum of compound 1.....                          | 19 |
| Figure S18 - ROESY spectrum of compound 1 zoomed-in (a) .....           | 20 |
| Figure S19 - ROESY spectrum of compound 1 zoomed-in (b) .....           | 21 |
| Figure S20 - $^1\text{H}$ spectrum of compound 2 .....                  | 22 |
| Figure S21 - $^1\text{H}$ spectrum of compound 2 zoomed-in (a) .....    | 23 |
| Figure S22 - $^1\text{H}$ spectrum of compound 2 zoomed-in (b) .....    | 24 |
| Figure S23 - $^{13}\text{C}$ spectrum of compound 2.....                | 25 |
| Figure S24 - $^{13}\text{C}$ spectrum of compound 2 zoomed-in (a) ..... | 26 |
| Figure S25 - $^{13}\text{C}$ spectrum of compound 2 zoomed-in (b) ..... | 27 |
| Figure S26 - $^{13}\text{C}$ spectrum of compound 2 zoomed-in (c) ..... | 28 |
| Figure S27 - HSQC spectrum of compound 2 .....                          | 29 |
| Figure S28 - HSQC spectrum of compound 2 zoomed-in (a).....             | 30 |
| Figure S29- HSQC spectrum of compound 2 zoomed-in (b) .....             | 31 |
| Figure S30 - HSQC spectrum of compound 2 zoomed-in (c).....             | 32 |
| Figure S31 - HMBC spectrum of compound 2 .....                          | 33 |
| Figure S32 - HMBC spectrum of compound 2 zoomed-in (a).....             | 34 |
| Figure S33 - HMBC spectrum of compound 2 zoomed-in (b) .....            | 35 |
| Figure S34 - HMBC spectrum of compound 2 zoomed-in (c).....             | 36 |
| Figure S35 - COSY spectrum of compound 2.....                           | 37 |
| Figure S36 - COSY spectrum of compound 2 zoomed-in.....                 | 38 |
| Figure S37 - ROESY spectrum of compound 2.....                          | 39 |
| Figure S38 - ROESY spectrum of compound 2 zoomed-in.....                | 40 |

**Compound 1**

Sample Name **WSR221113**  
Date collected **2021-05-11**

Pulse sequence **PRESAT**  
Solvent **cd3od**

Temperature **27**  
Spectrometer **Agilent-NMR-inova600**

Study owner **npchem**  
Operator **npchem**

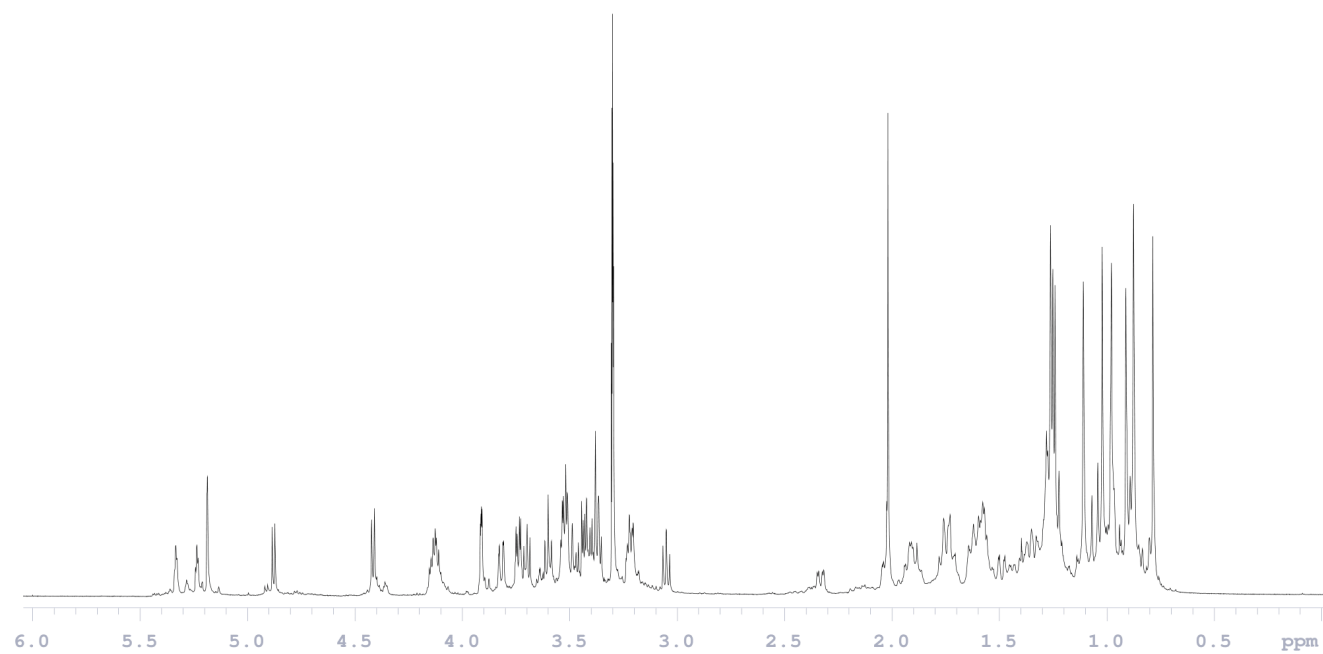

Data file exp

Plot date 2021-05-11

Figure S1 -  $^1\text{H}$  spectrum of compound 1

Compound 1

Sample Name WSR221113  
Date collected 2021-05-11

Pulse sequence PRESAT  
Solvent cd3od

Temperature 27  
Spectrometer Agilent-NMR-inova600

Study owner npchem  
Operator npchem

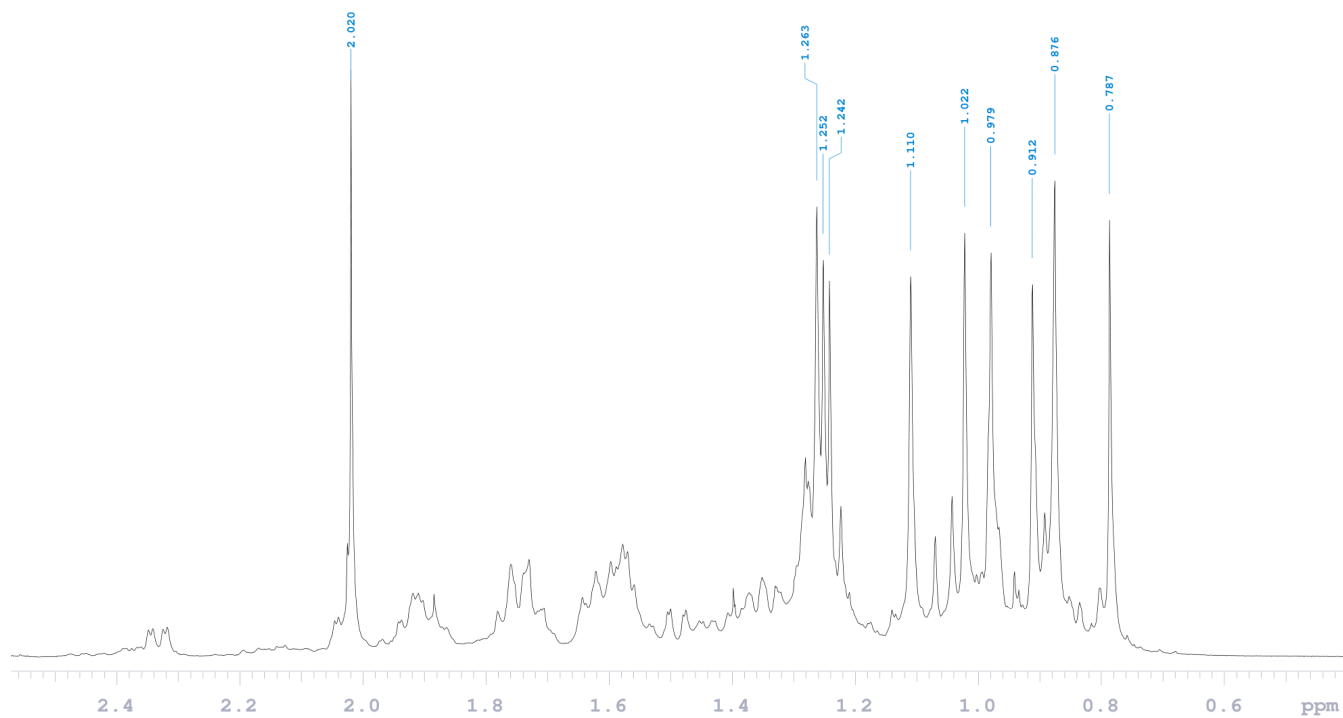

Data file exp

Plot date 2021-05-11

Figure S2 - <sup>1</sup>H spectrum of compound 1 zoomed-in (a)

Compound 1

Sample Name WSR221113  
Date collected 2021-05-11

Pulse sequence PRESAT  
Solvent cd3od

Temperature 27  
Spectrometer Agilent-NMR-inova600

Study owner npchem  
Operator npchem

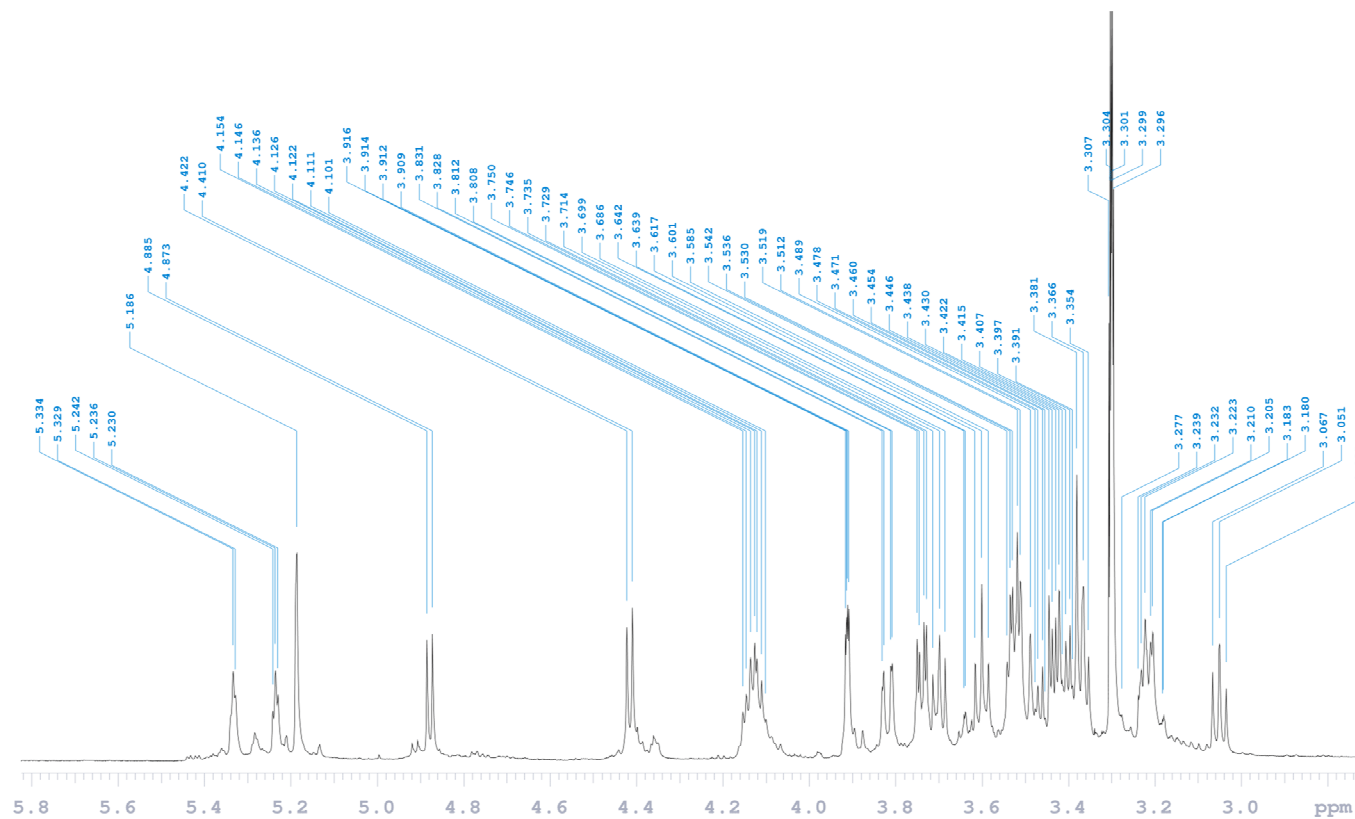

Data file exp

Plot date 2021-05-11

Figure S3 -  $^1\text{H}$  spectrum of compound 1 zoomed-in (b)

**Compound 1**

Sample Name **WSR221113**  
Date collected **2021-05-11**

Pulse sequence **CARBON**  
Solvent **cd3od**

Temperature **27**  
Spectrometer **Agilent-NMR-inova600**

Study owner **npchem**  
Operator **npchem**

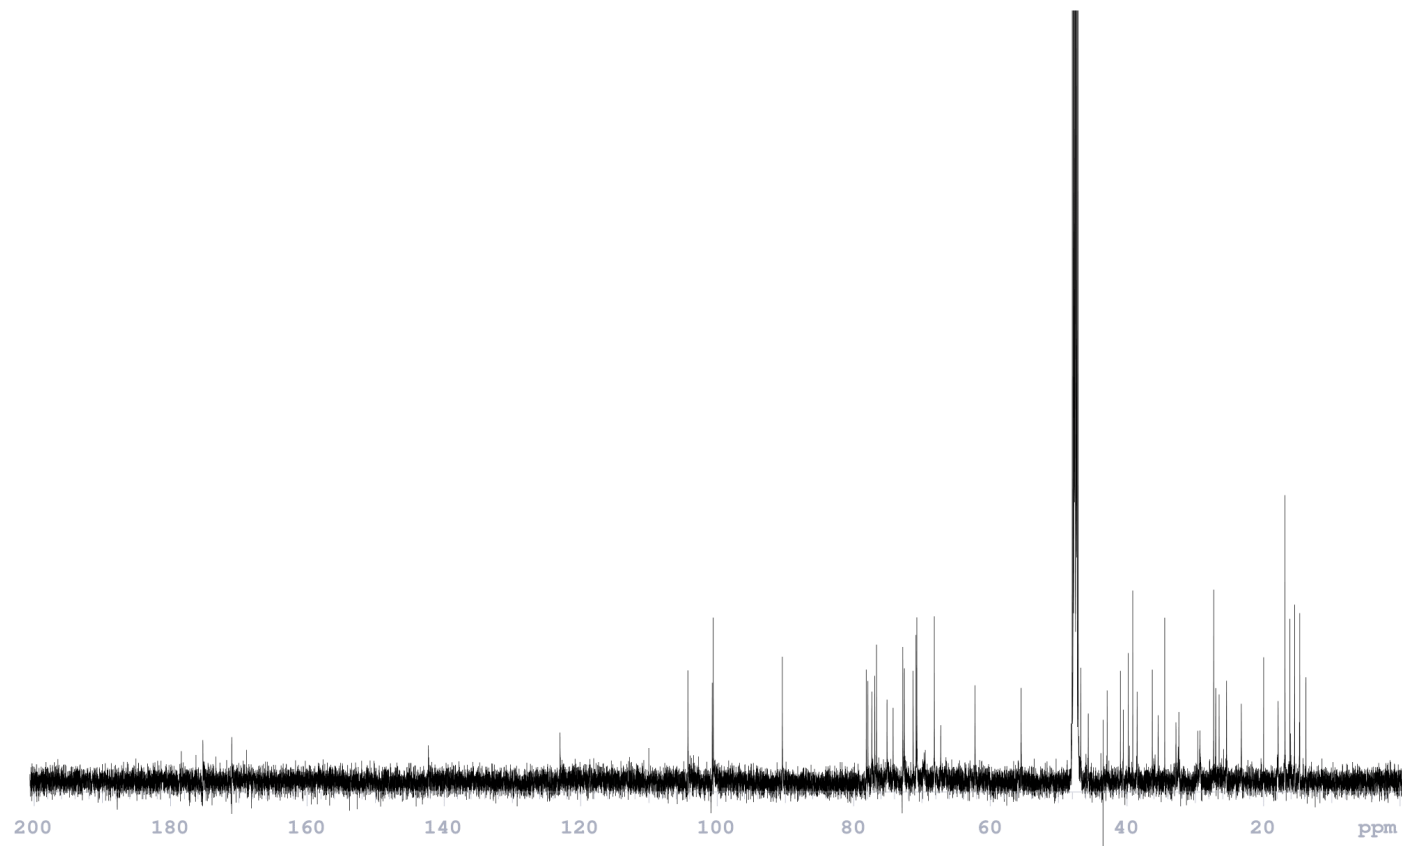

Data file exp

Plot date 2021-05-12

Figure S4 -  $^{13}\text{C}$  spectrum of compound 1

Compound 1

Sample Name WSR221113  
Date collected 2021-05-11

Pulse sequence CARBON  
Solvent cd3od

Temperature 27  
Spectrometer Agilent-NMR-inova600

Study owner npchem  
Operator npchem

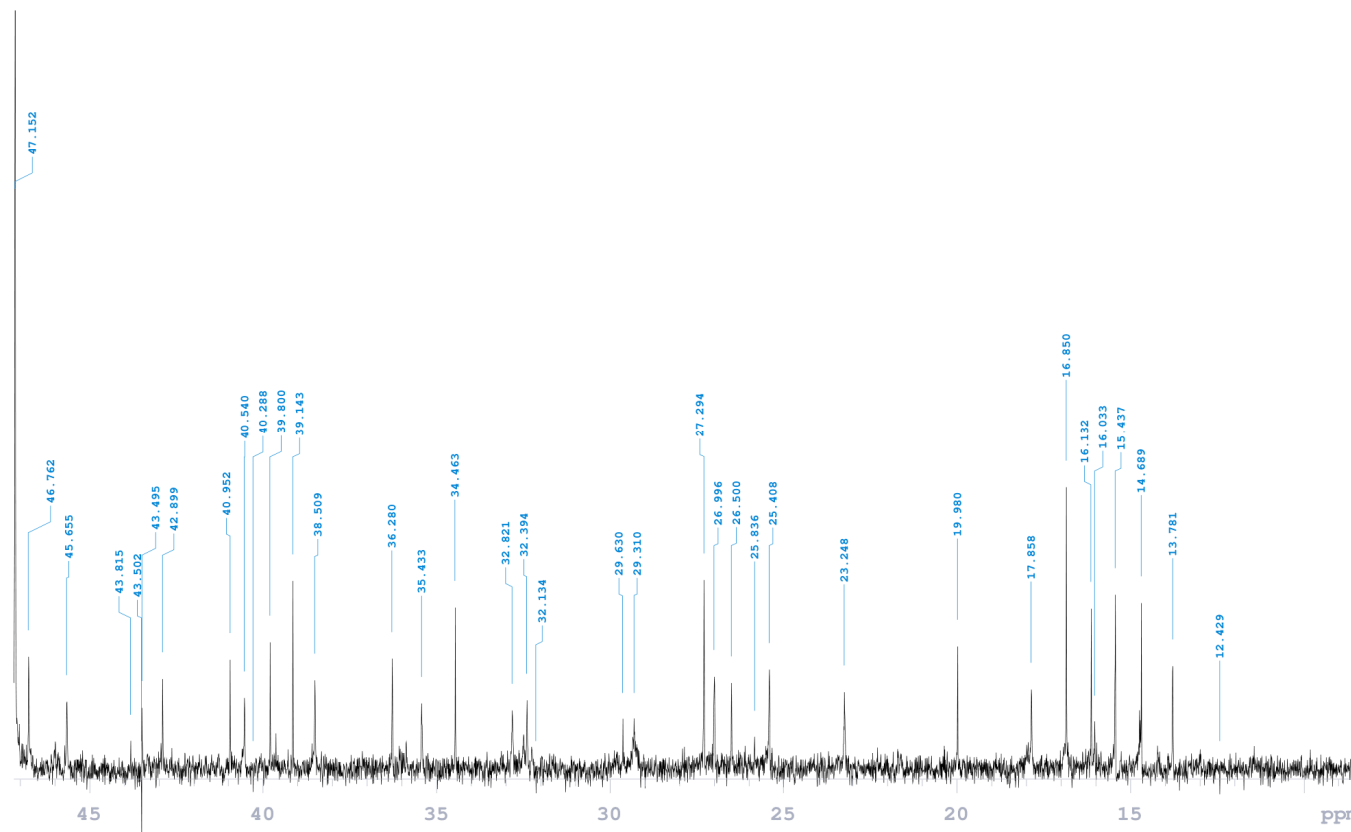

Data file exp

Plot date 2021-05-12

Figure S5 -  $^{13}\text{C}$  spectrum of compound 1 zoomed-in (a)

Compound 1

Sample Name WSR221113  
Date collected 2021-05-11

Pulse sequence CARBON  
Solvent cd3od

Temperature 27  
Spectrometer Agilent-NMR-inova600

Study owner npchem  
Operator npchem

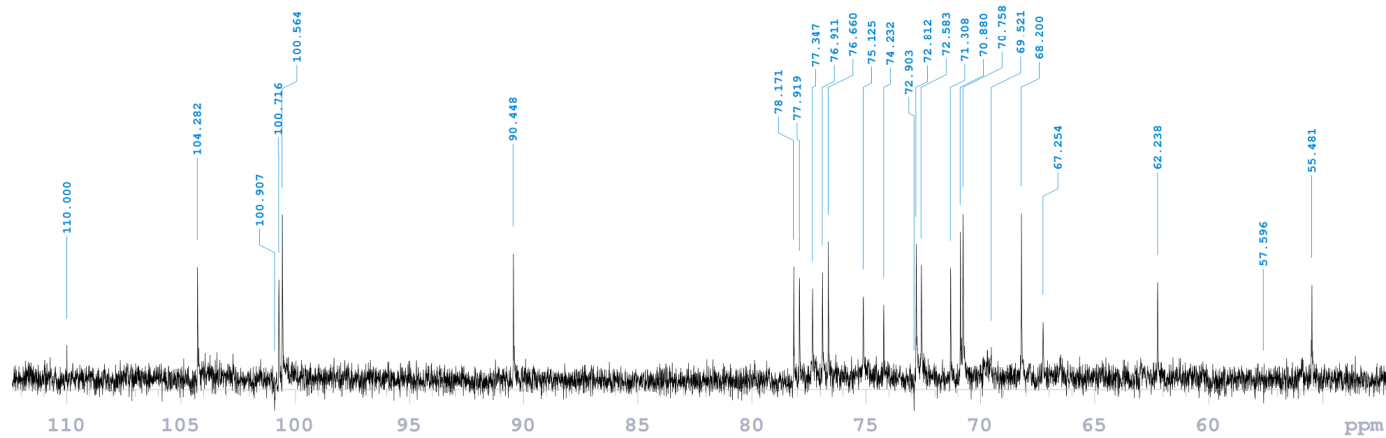

Data file exp

Plot date 2021-05-12

Figure S6 -  $^{13}\text{C}$  spectrum of compound 1 zoomed-in (b)

Compound 1

Sample Name WSR221113  
Date collected 2021-05-11

Pulse sequence CARBON  
Solvent cd3od

Temperature 27  
Spectrometer Agilent-NMR-inova600

Study owner npchem  
Operator npchem

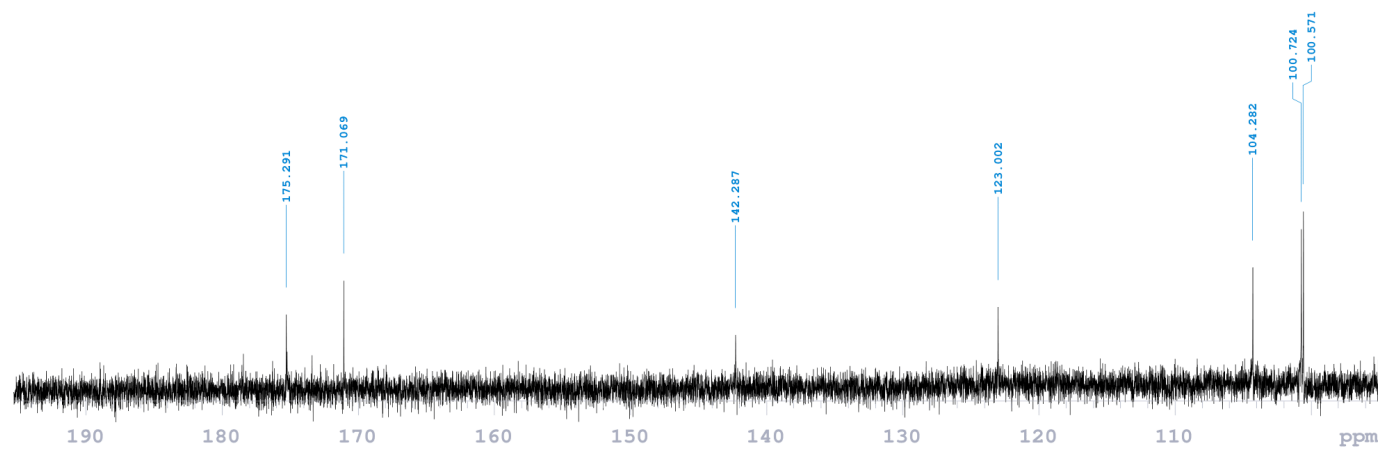

Data file exp

Plot date 2021-05-12

Figure S7 -  $^{13}\text{C}$  spectrum of compound 1 zoomed-in (c)

Compound 1

Sample Name WSR221113  
Date collected 2021-05-11

Pulse sequence gHSQCAD  
Solvent cd3od

Temperature 27  
Spectrometer Agilent-NMR-inova600

Study owner npchem  
Operator npchem

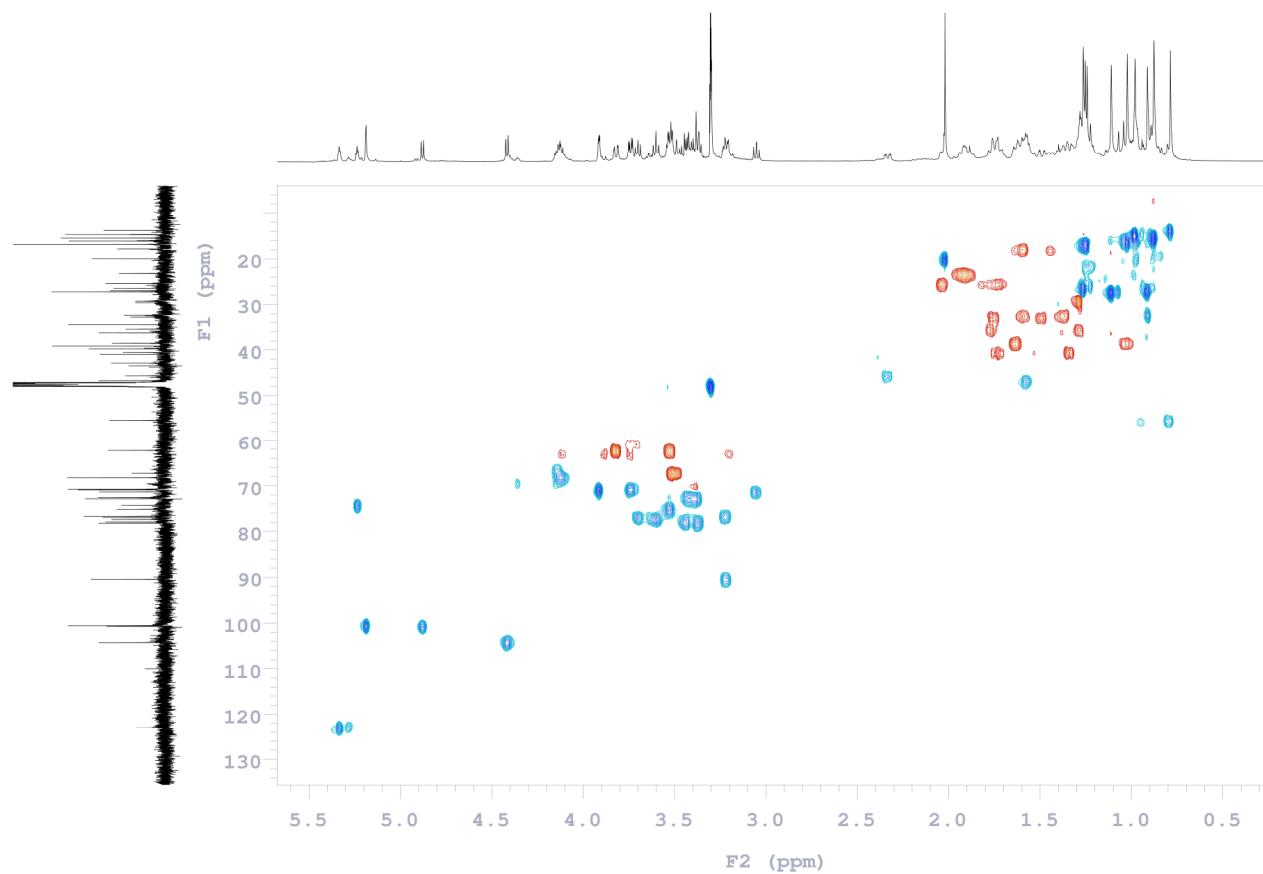

Figure S8 - HSQC spectrum of compound 1

Compound 1

Sample Name **WSR221113**  
Date collected **2021-05-11**

Pulse sequence **gHSQCAD**  
Solvent **cd3od**

Temperature **27**  
Spectrometer **Agilent-NMR-inova600**

Study owner **npchem**  
Operator **npchem**

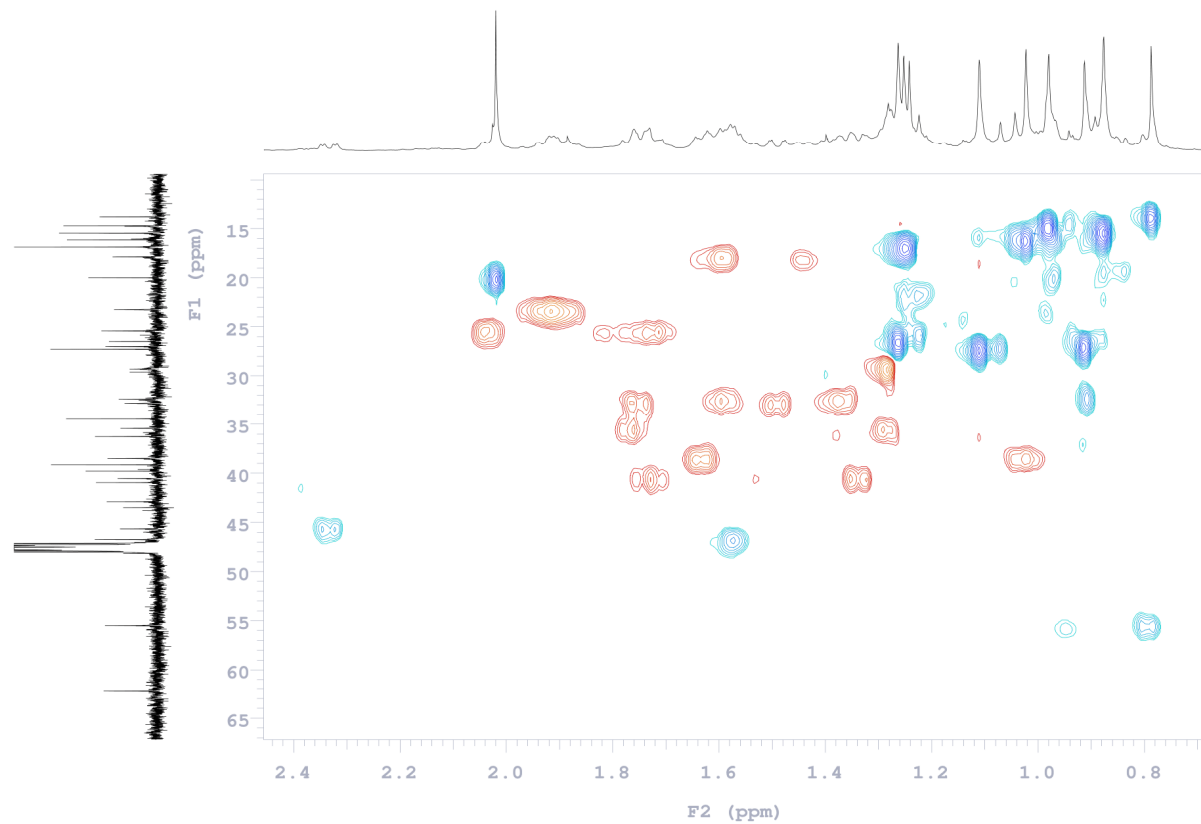

Data file exp

Plot date 2021-05-12

Figure S9 - HSQC spectrum of compound 1 zoomed-in (a)

Compound 1

Sample Name WSR221113  
Date collected 2021-05-11

Pulse sequence gHSQCAD  
Solvent cd3od

Temperature 27  
Spectrometer Agilent-NMR-inova600

Study owner npchem  
Operator npchem

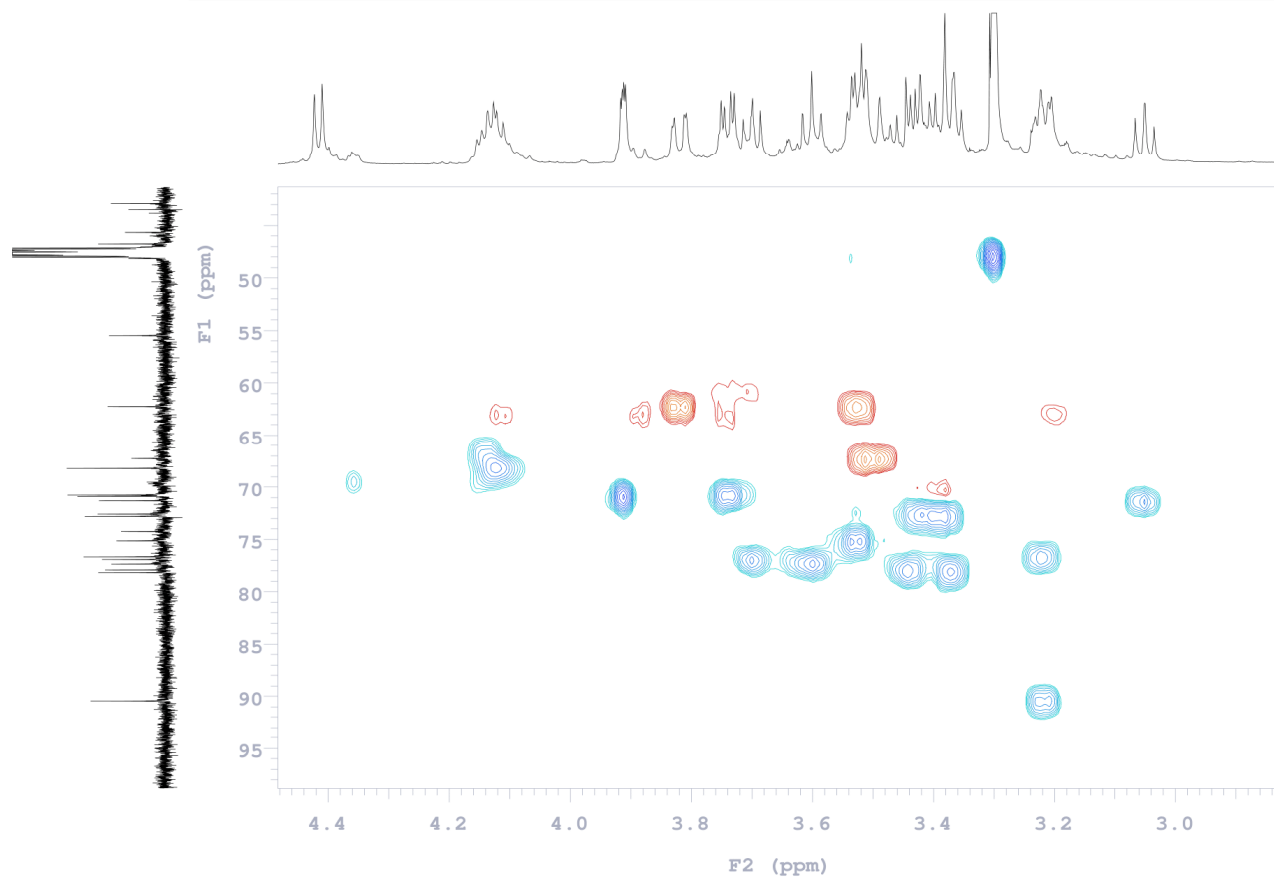

Figure S10 - HSQC spectrum of compound 1 zoomed-in (b)

Compound 1

Sample Name WSR221113  
Date collected 2021-05-11

Pulse sequence gHSQCAD  
Solvent cd3od

Temperature 27  
Spectrometer Agilent-NMR-inova600

Study owner npchem  
Operator npchem

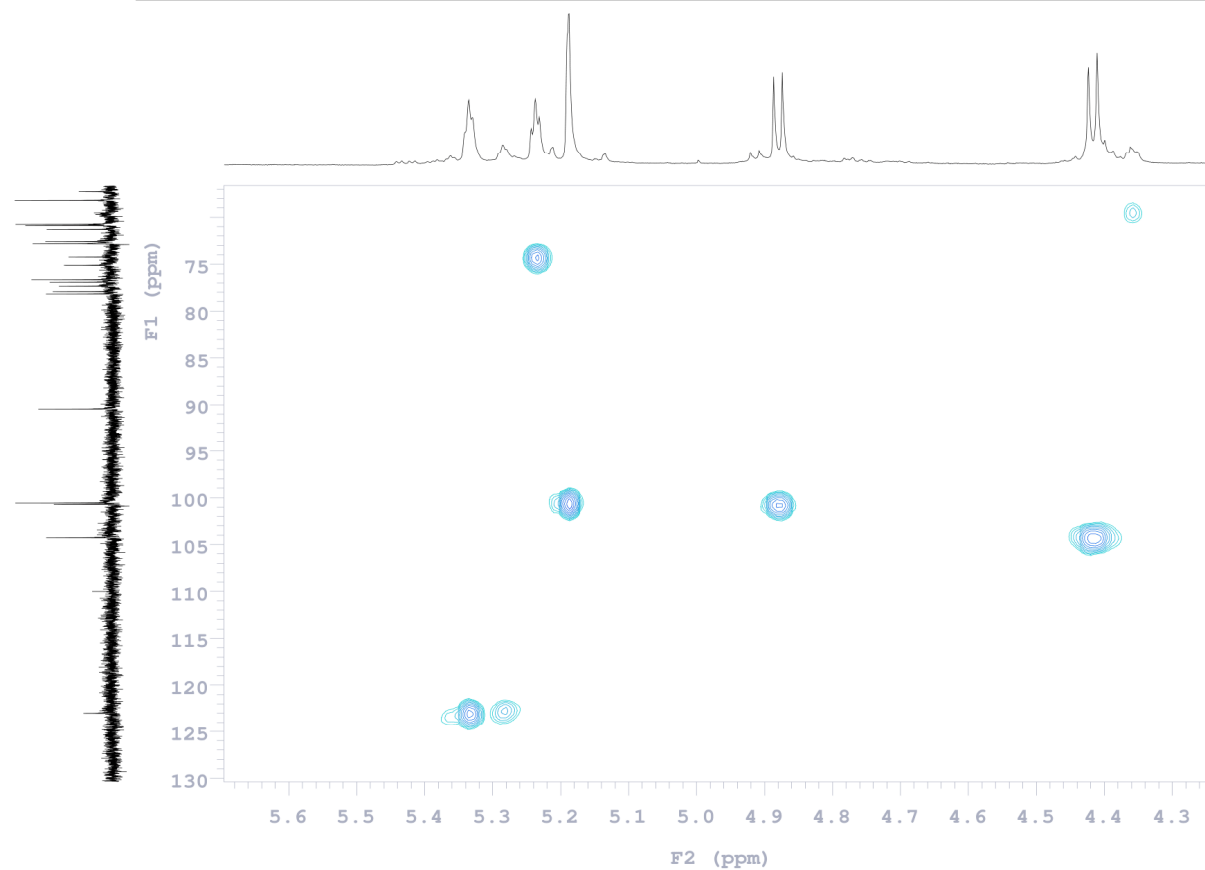

Data file exp

Plot date 2021-05-12

Figure S11 - HSQC spectrum of compound 1 zoomed-in (c)

Compound 1

Sample Name WSR221113  
Date collected 2021-05-11

Pulse sequence gHMBCAD  
Solvent cd3od

Temperature 27  
Spectrometer Agilent-NMR-inova600

Study owner npchem  
Operator npchem

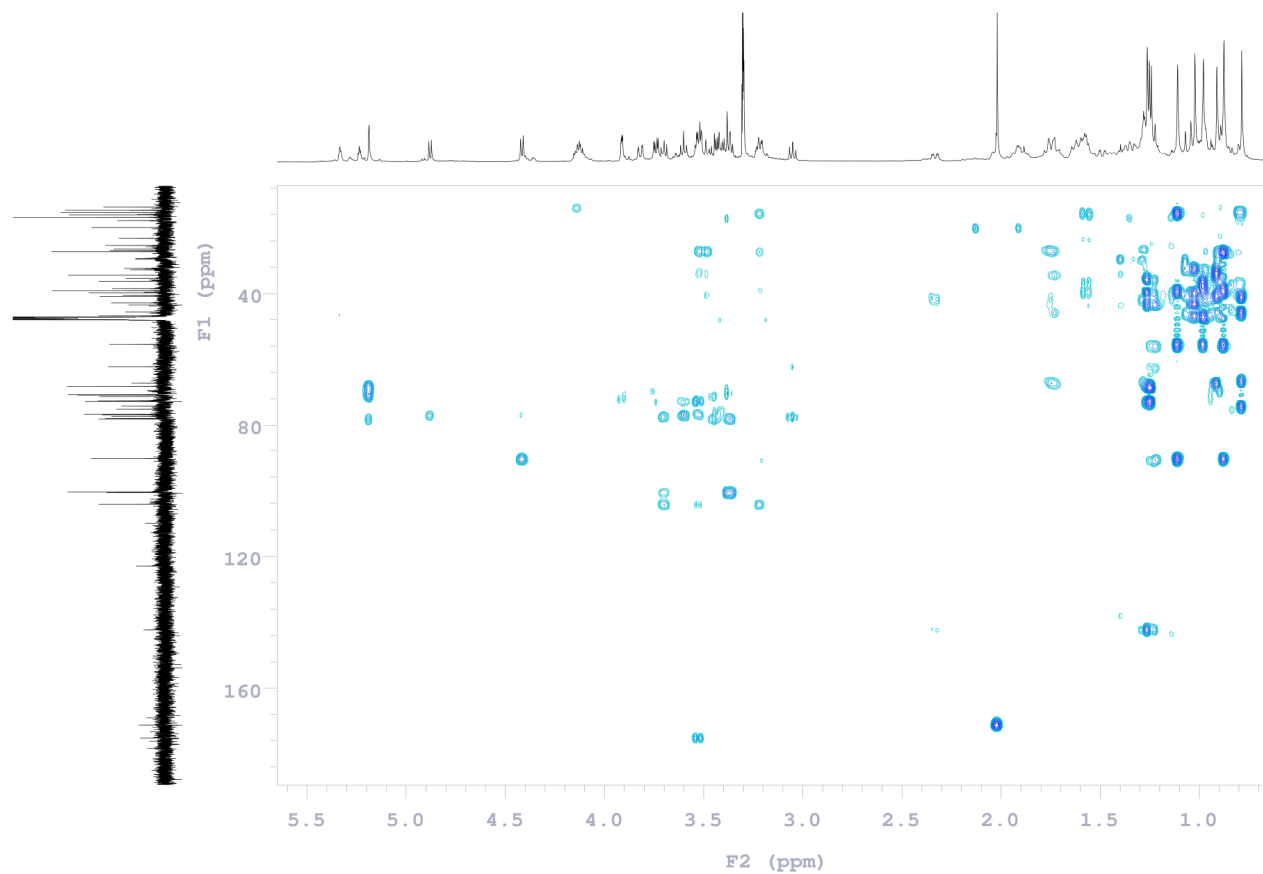

Data file exp

Plot date 2021-05-12

Figure S12 - HMBC spectrum of compound-in 1

Compound 1

Sample Name WSR221113  
Date collected 2021-05-11

Pulse sequence gHMBCAD  
Solvent cd3od

Temperature 27  
Spectrometer Agilent-NMR-inova600

Study owner npchem  
Operator npchem

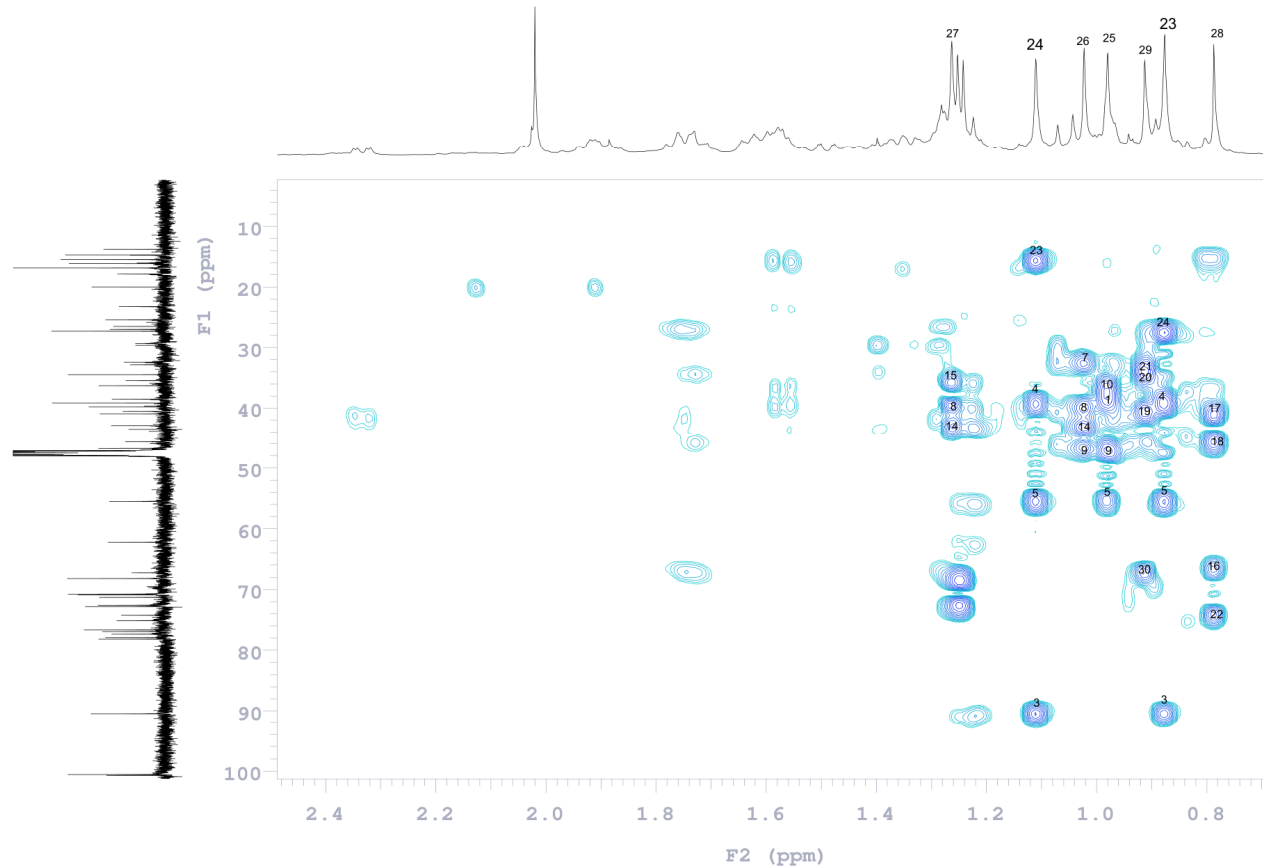

Figure S13 - HMBC spectrum of compound 1 zoomed-in

**Compound 1**

Sample Name **WSR221113**  
Date collected **2021-05-11**

Pulse sequence **gCOSY**  
Solvent **cd3od**

Temperature **27**  
Spectrometer **Agilent-NMR-inova600**

Study owner **npchem**  
Operator **npchem**

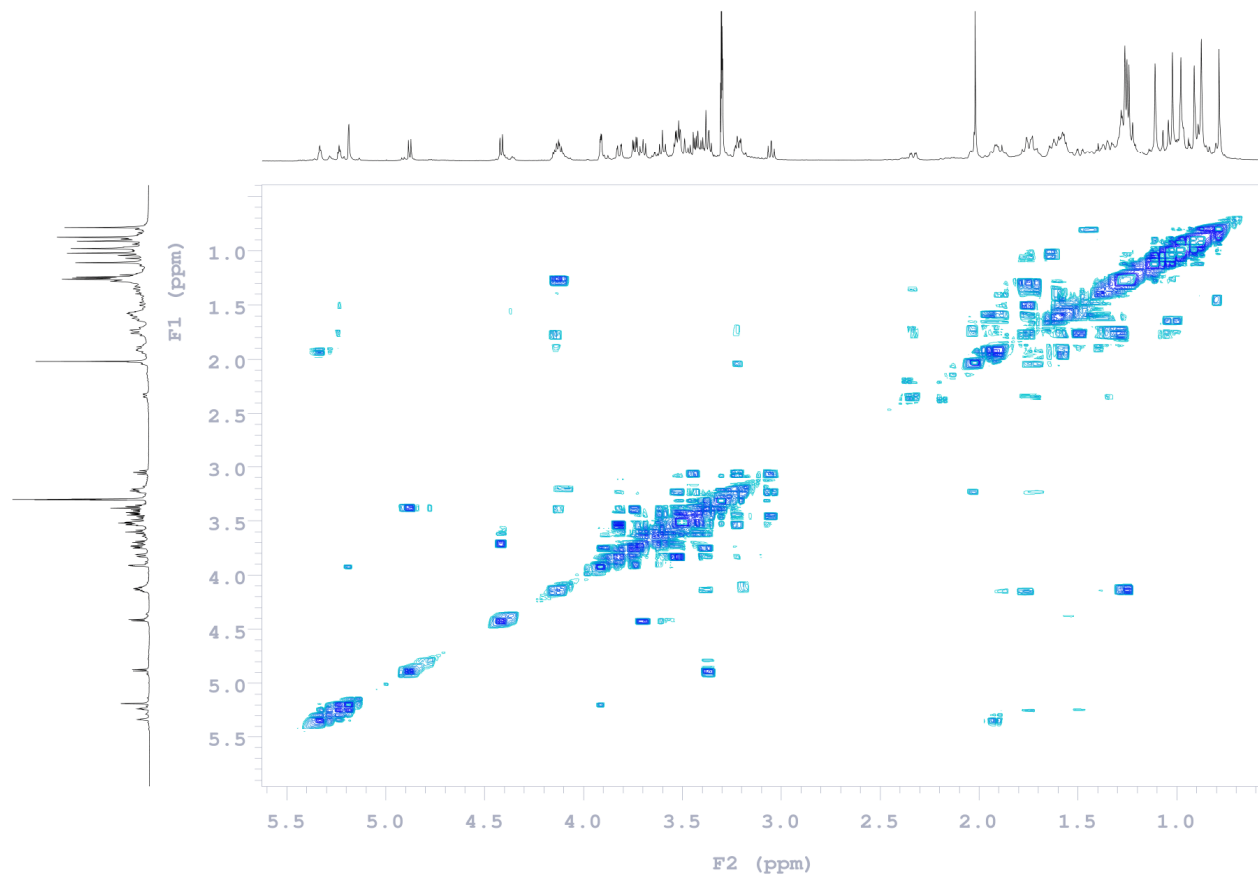

Figure S14 - COSY spectrum of compound 1

Compound 1

Sample Name WSR221113  
Date collected 2021-05-11

Pulse sequence gCOSY  
Solvent cd3od

Temperature 27  
Spectrometer Agilent-NMR-inova600

Study owner npchem  
Operator npchem

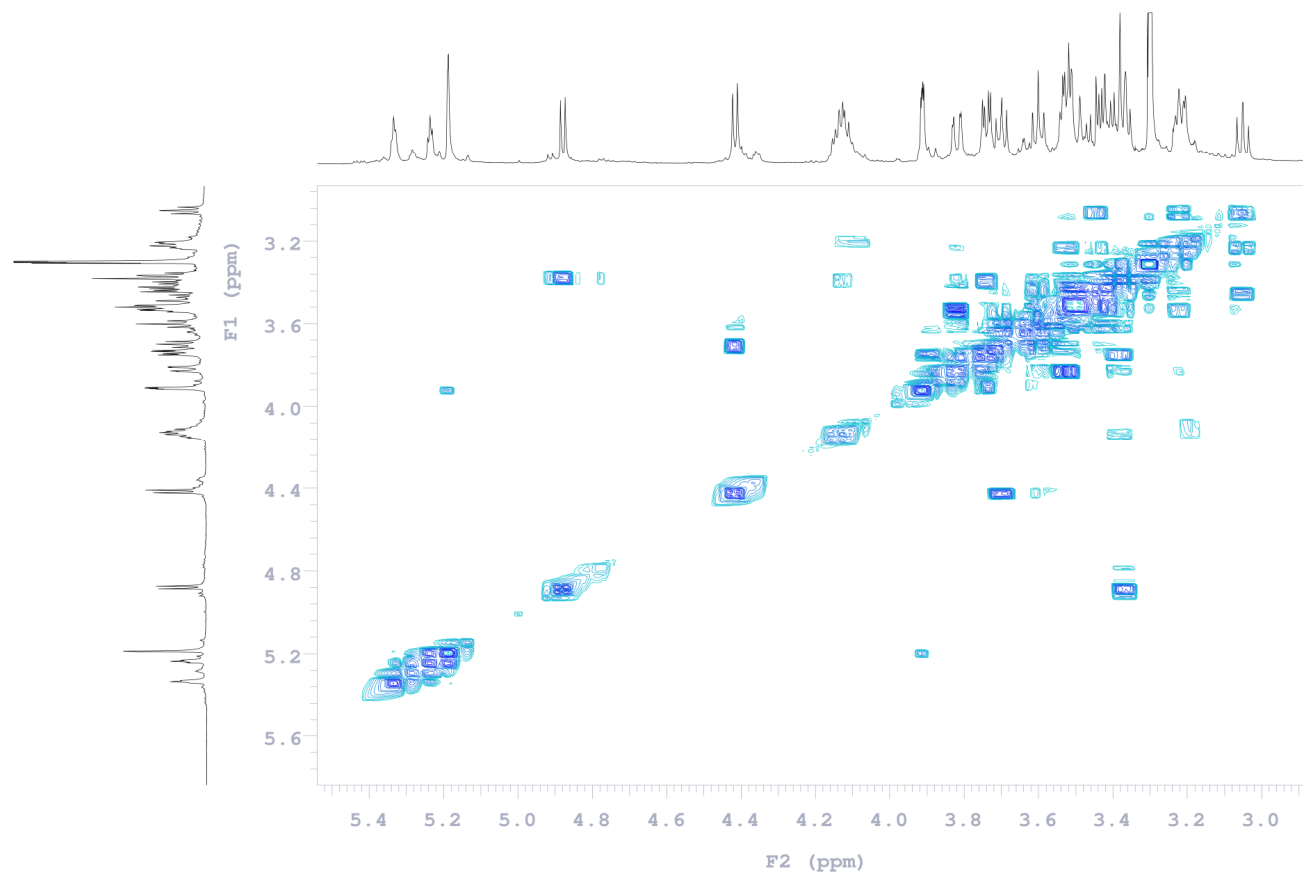

Figure S15 - COSY spectrum of compound 1 zoomed-in (a)

Compound 1

Sample Name WSR221113  
Date collected 2021-05-11

Pulse sequence gCOSY  
Solvent cd3od

Temperature 27  
Spectrometer Agilent-NMR-inova600

Study owner npchem  
Operator npchem

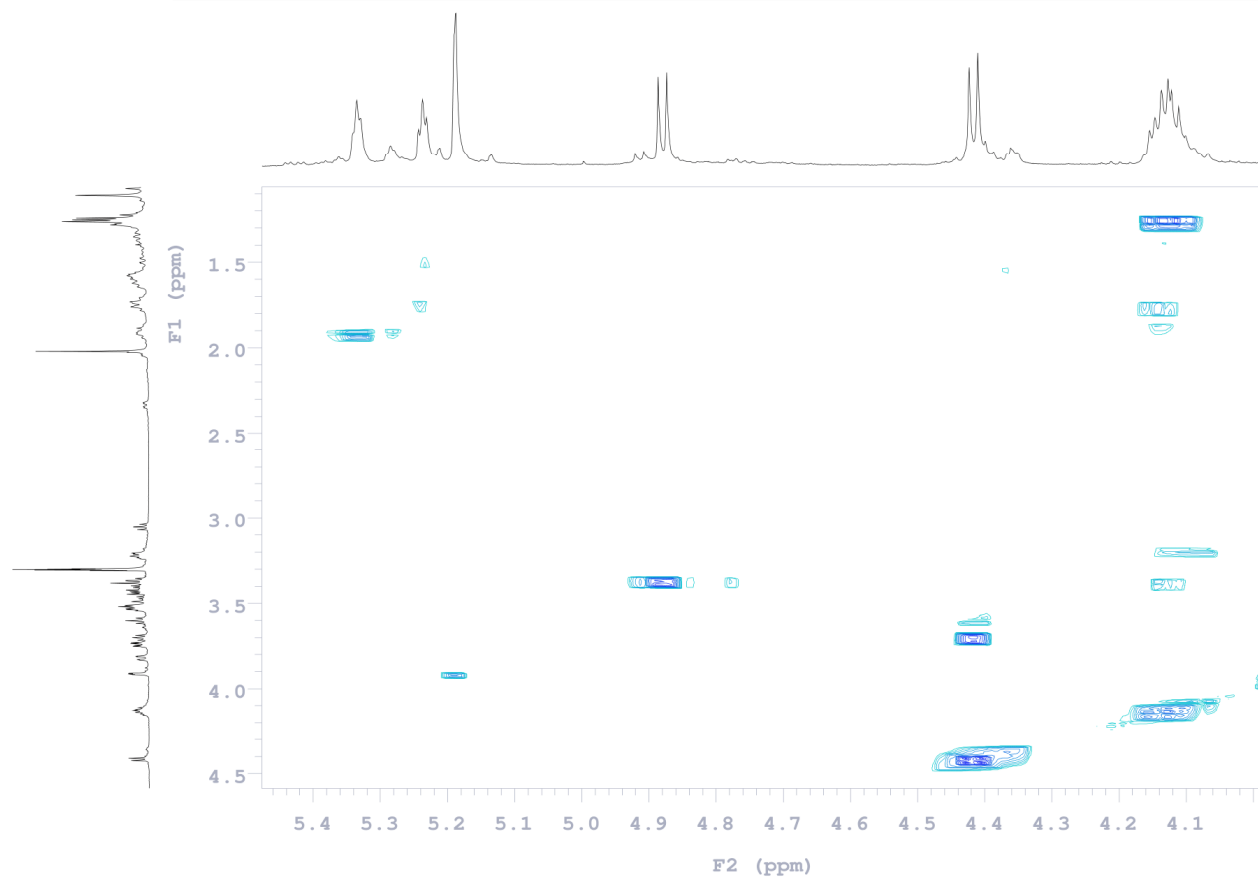

Figure S16 - COSY spectrum of compound 1 zoomed-in (b)

Compound 1

Sample Name WSR221113r  
Date collected 2021-05-18

Pulse sequence ROESYAD  
Solvent cd3od

Temperature 27  
Spectrometer Agilent-NMR-inova600

Study owner npchem  
Operator npchem

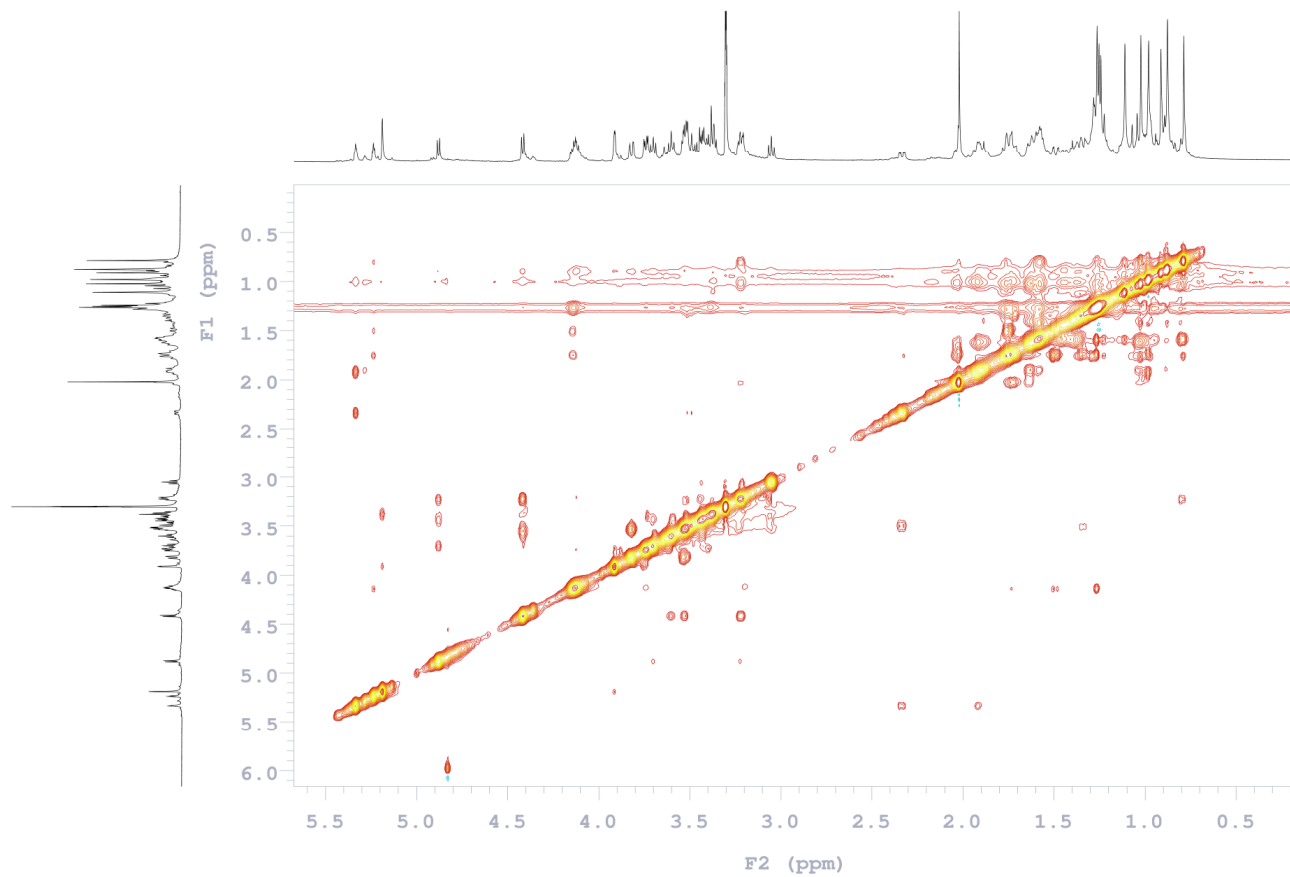

Figure S17 - ROESY spectrum of compound 1

**Compound 1**

Sample Name **WSR221113r**  
Date collected **2021-05-18**

Pulse sequence **ROESYAD**  
Solvent **cd3od**

Temperature **27**  
Spectrometer **Agilent-NMR-inova600**

Study owner **npchem**  
Operator **npchem**

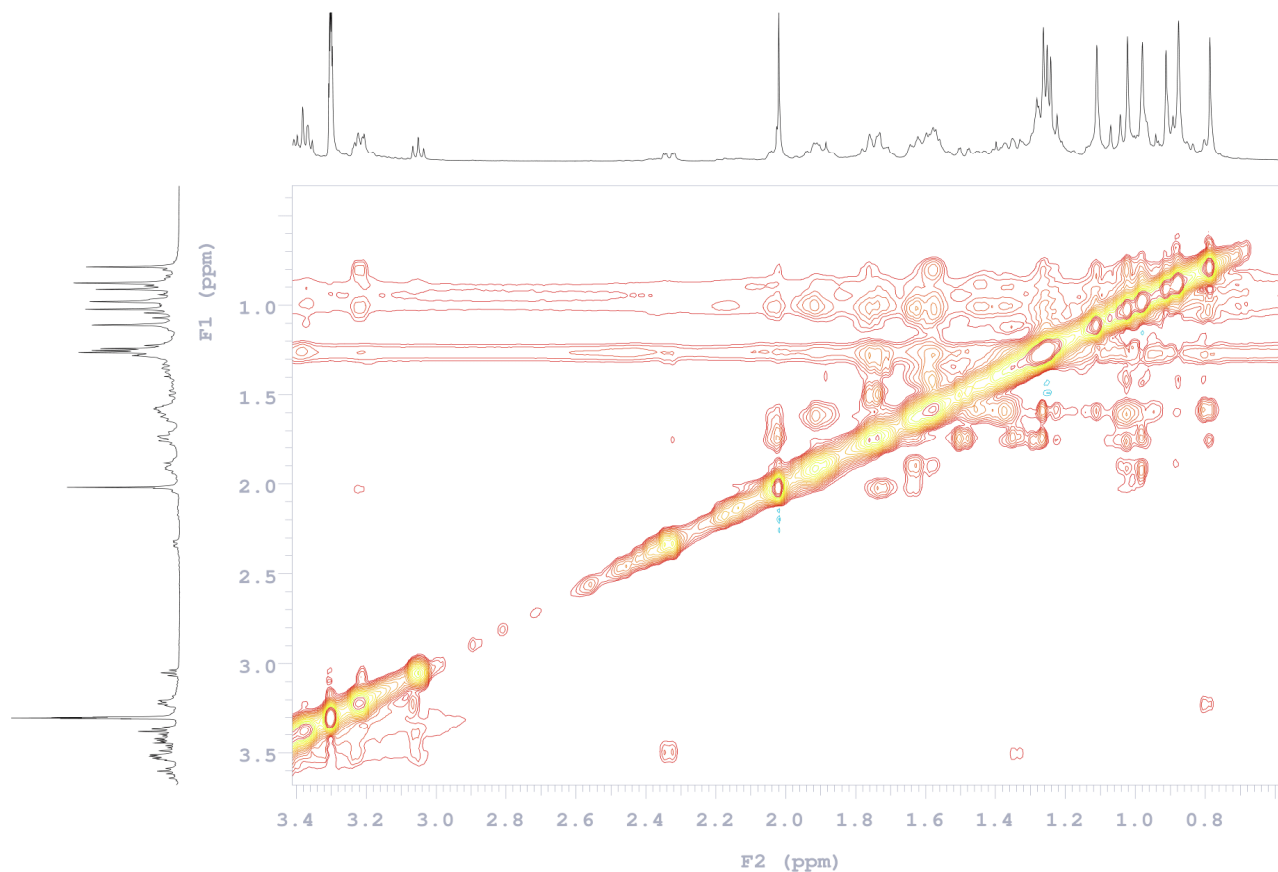

Data file exp

Plot date 2021-05-18

Figure S18 - ROESY spectrum of compound 1 zoomed-in (a)

**Compound 1**

Sample Name **WSR221113r**  
Date collected **2021-05-18**

Pulse sequence **ROESYAD**  
Solvent **cd3od**

Temperature **27**  
Spectrometer **Agilent-NMR-inova600**

Study owner **npchem**  
Operator **npchem**

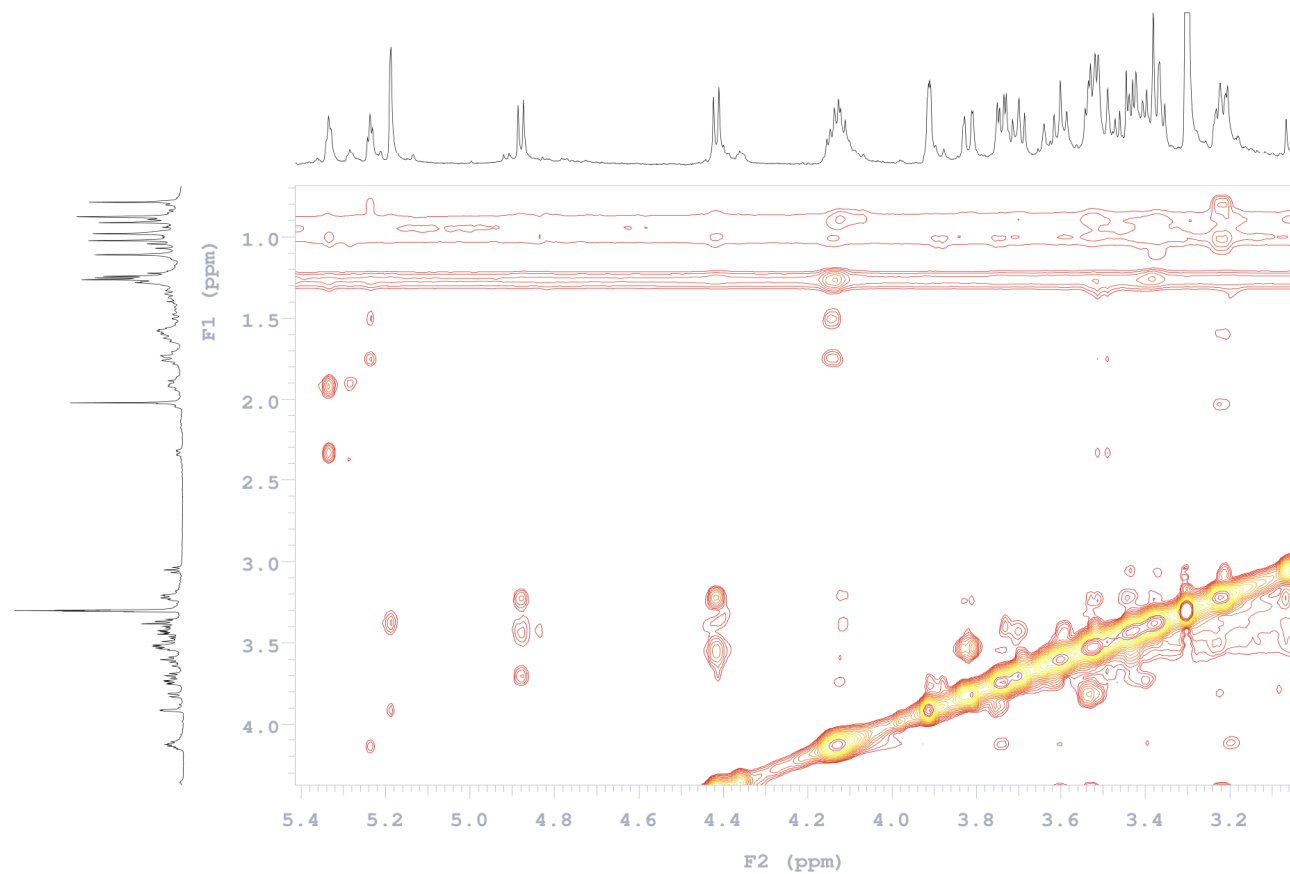

Data file exp

Plot date 2021-05-18

Figure S19 - ROESY spectrum of compound 1 zoomed-in (b)

**Compound 2**

Sample Name **WSR224b**  
Date collected **2021-02-24**

Pulse sequence **PRESAT**  
Solvent **cd3od**

Temperature **27**  
Spectrometer **Agilent-NMR-inova600**

Study owner **npchem**  
Operator **npchem**

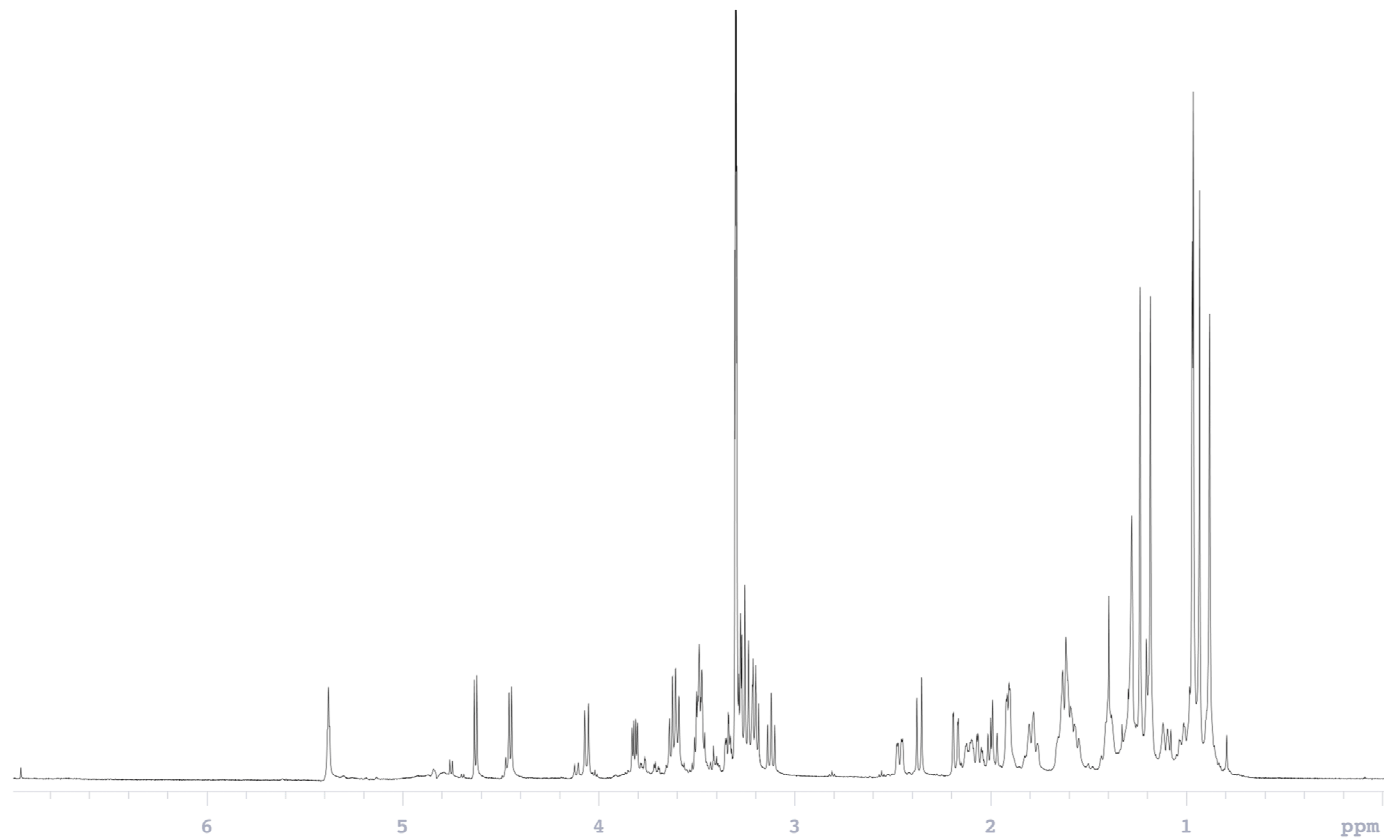

Data file exp

Plot date 2021-02-24

Figure S20 - <sup>1</sup>H spectrum of compound 2

Compound 2

Sample Name WSR224b  
Date collected 2021-02-24

Pulse sequence PRESAT  
Solvent cd3od

Temperature 27  
Spectrometer Agilent-NMR-inova600

Study owner npchem  
Operator npchem

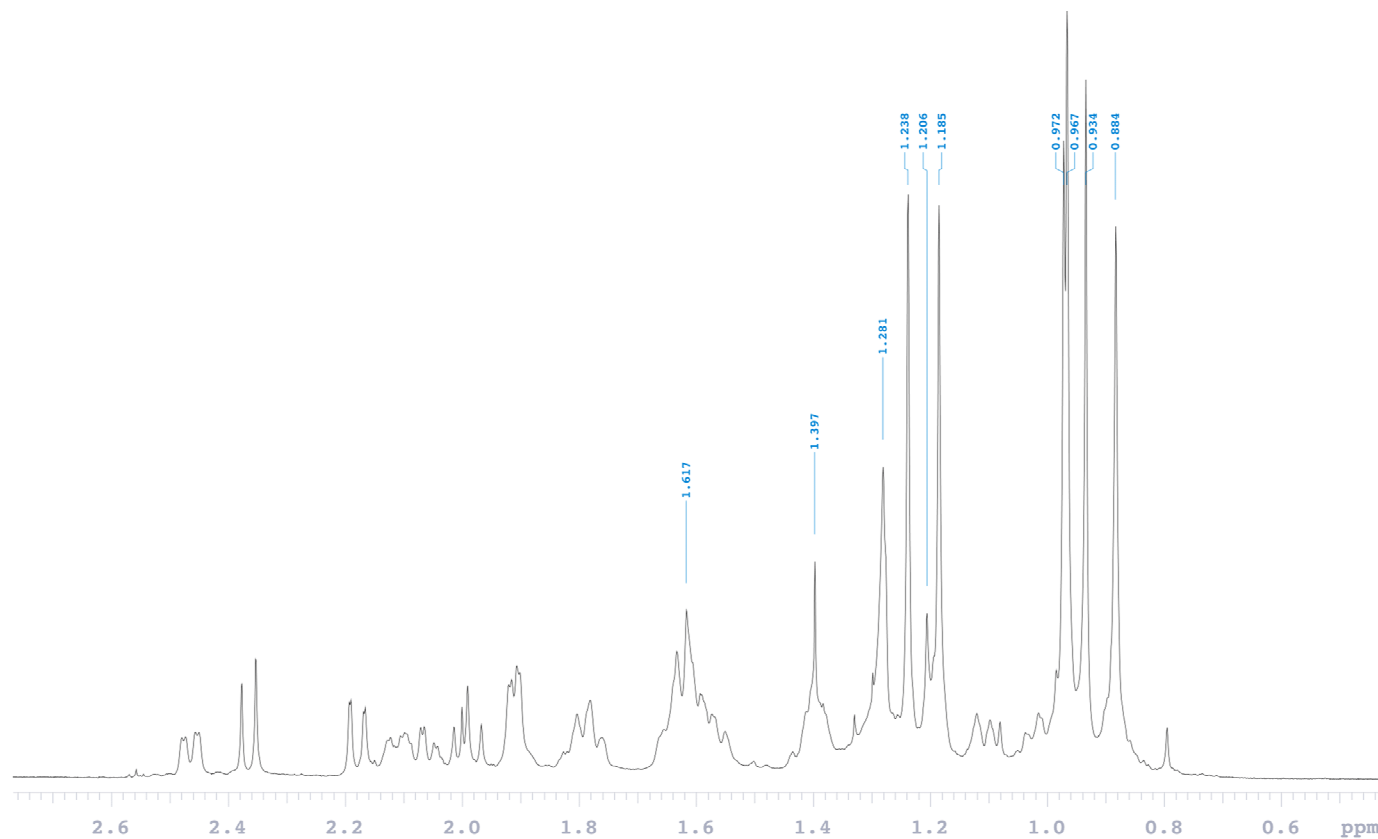

Data file exp

Plot date 2021-02-24

Figure S21 - <sup>1</sup>H spectrum of compound 2 zoomed-in (a)

Compound 2

Sample Name WSR224b  
Date collected 2021-02-24

Pulse sequence PRESAT  
Solvent cd3od

Temperature 27  
Spectrometer Agilent-NMR-inova600

Study owner npchem  
Operator npchem

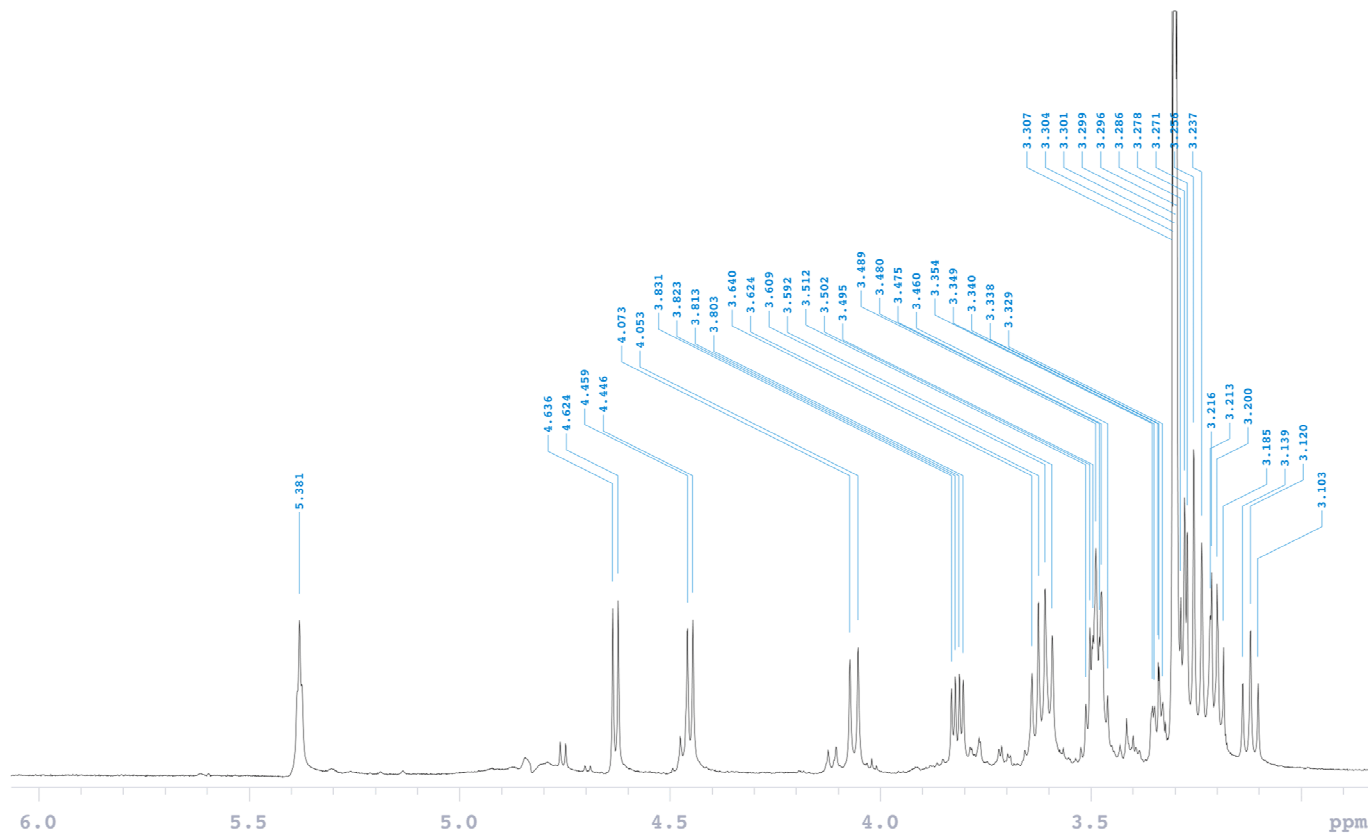

Data file exp

Plot date 2021-02-24

Figure S22 -  $^1\text{H}$  spectrum of compound 2 zoomed-in (b)

**Compound 2**

Sample Name **WSR224b**  
Date collected **2021-02-25**

Pulse sequence **CARBON**  
Solvent **cd3od**

Temperature **27**  
Spectrometer **Agilent-NMR-inova600**

Study owner **npchem**  
Operator **npchem**

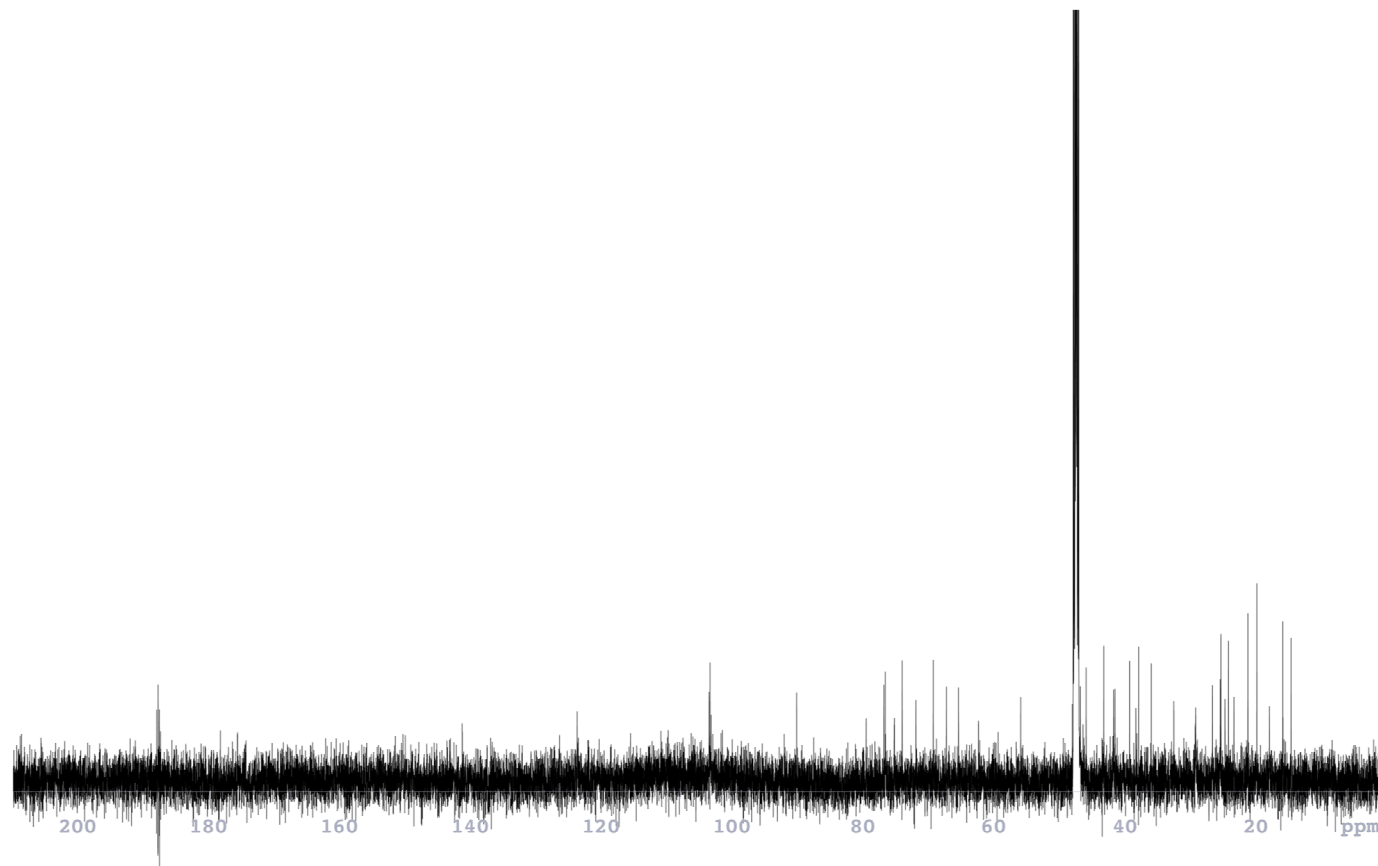

Data file exp

Plot date 2021-02-25

Figure S23 -  $^{13}\text{C}$  spectrum of compound 2

Compound 2

Sample Name WSR224b  
Date collected 2021-02-25

Pulse sequence CARBON  
Solvent cd3od

Temperature 27  
Spectrometer Agilent-NMR-inova600

Study owner npchem  
Operator npchem

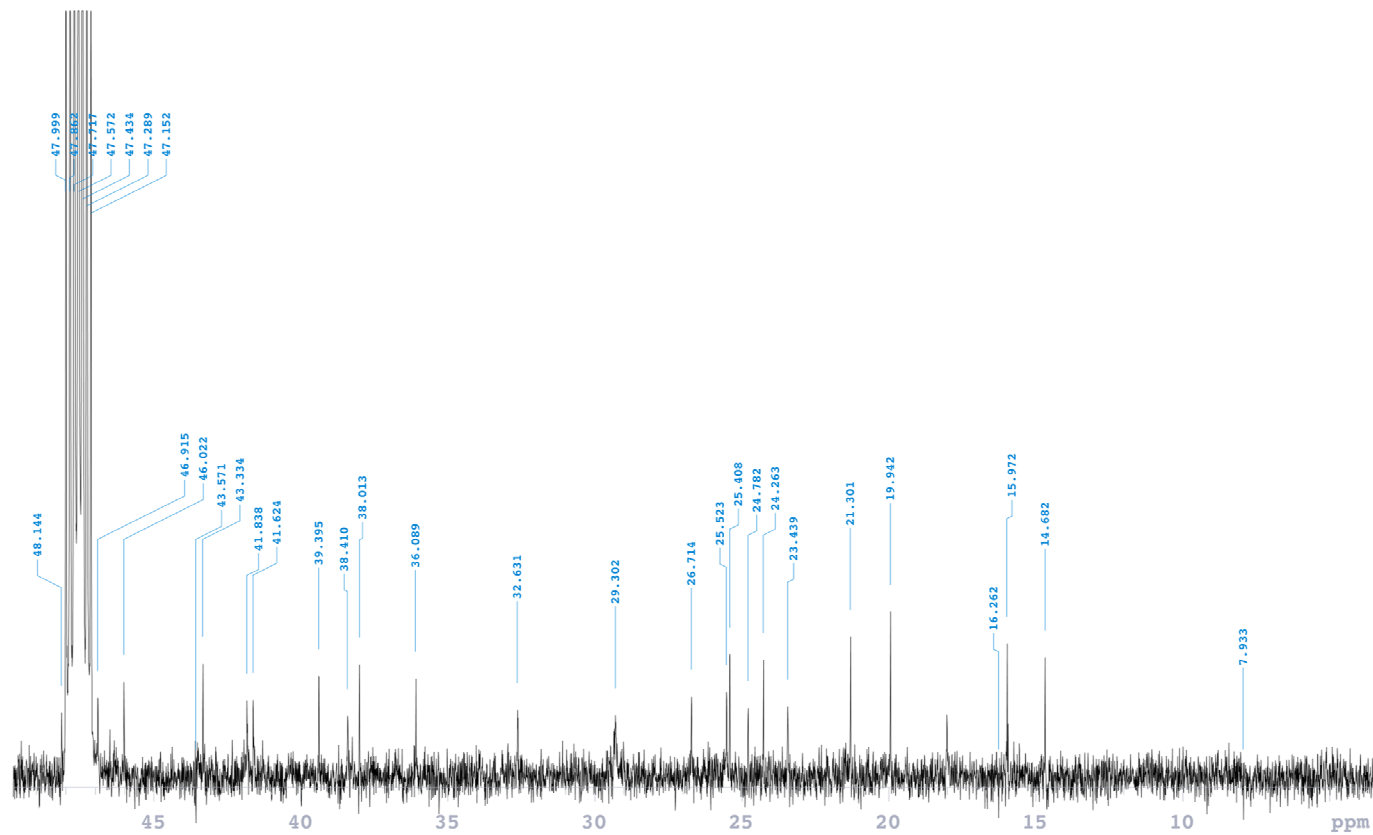

Data file exp

Plot date 2021-02-25

Figure S24 - <sup>13</sup>C spectrum of compound 2 zoomed-in (a)

# **Compound 2**

Sample Name **WSR224b**  
 Date collected **2021-02-25**

Pulse sequence **CARBON**  
 Solvent **cd3od**

Temperature **27**  
 Spectrometer **Agilent-NMR-inova600**

Study owner **npchem**  
 Operator **npchem**

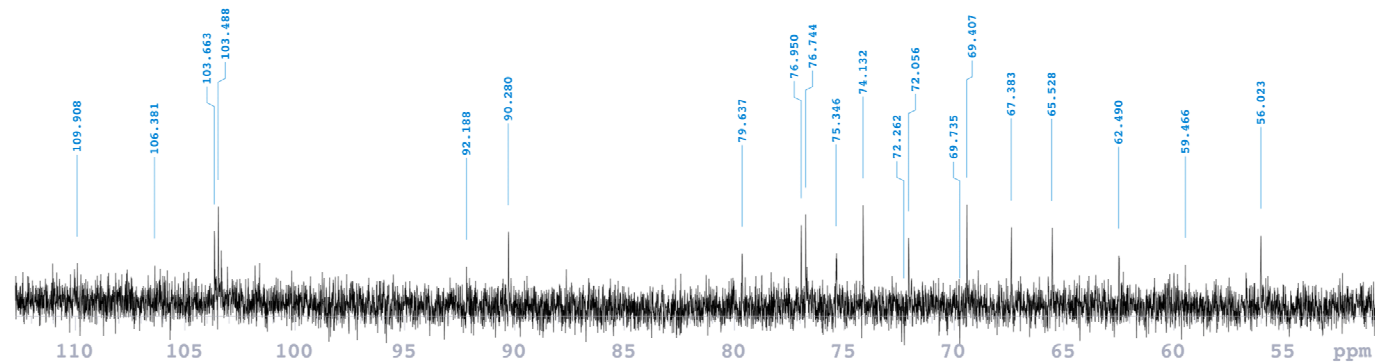

Data file exp

Plot date 2021-02-25

Figure S25 -  $^{13}\text{C}$  spectrum of compound 2 zoomed-in (b)

# Compound 2

Sample Name **WSR224b**  
Date collected **2021-02-25**

Pulse sequence **CARBON**  
Solvent **cd3od**

Temperature **27**  
Spectrometer **Agilent-NMR-inova600**

Study owner **npchem**  
Operator **npchem**

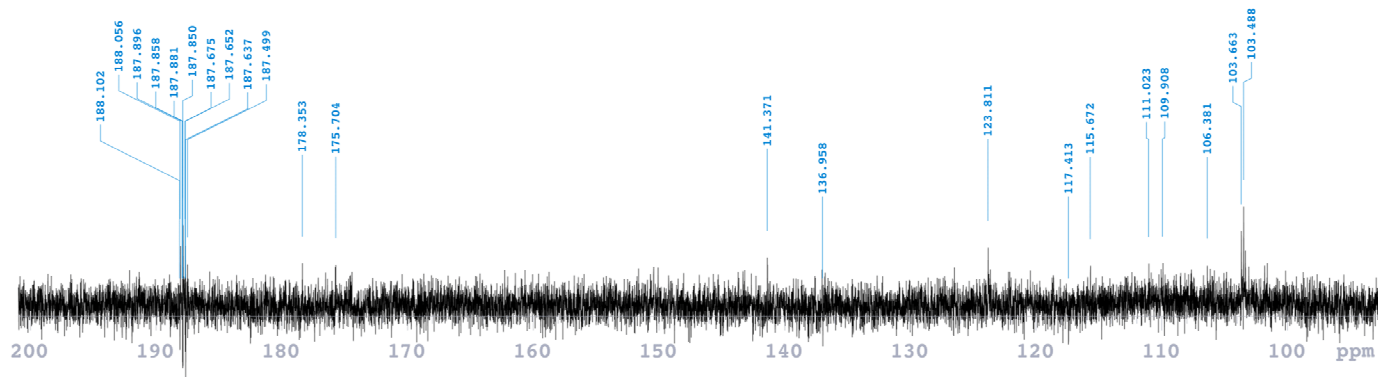

Data file exp

Plot date 2021-02-25

Figure S26 -  $^{13}\text{C}$  spectrum of compound 2 zoomed-in (c)

Compound 2

Sample Name WSR224b  
Date collected 2021-02-24

Pulse sequence gHSQCAD  
Solvent cd3od

Temperature 27  
Spectrometer Agilent-NMR-inova600

Study owner npchem  
Operator npchem

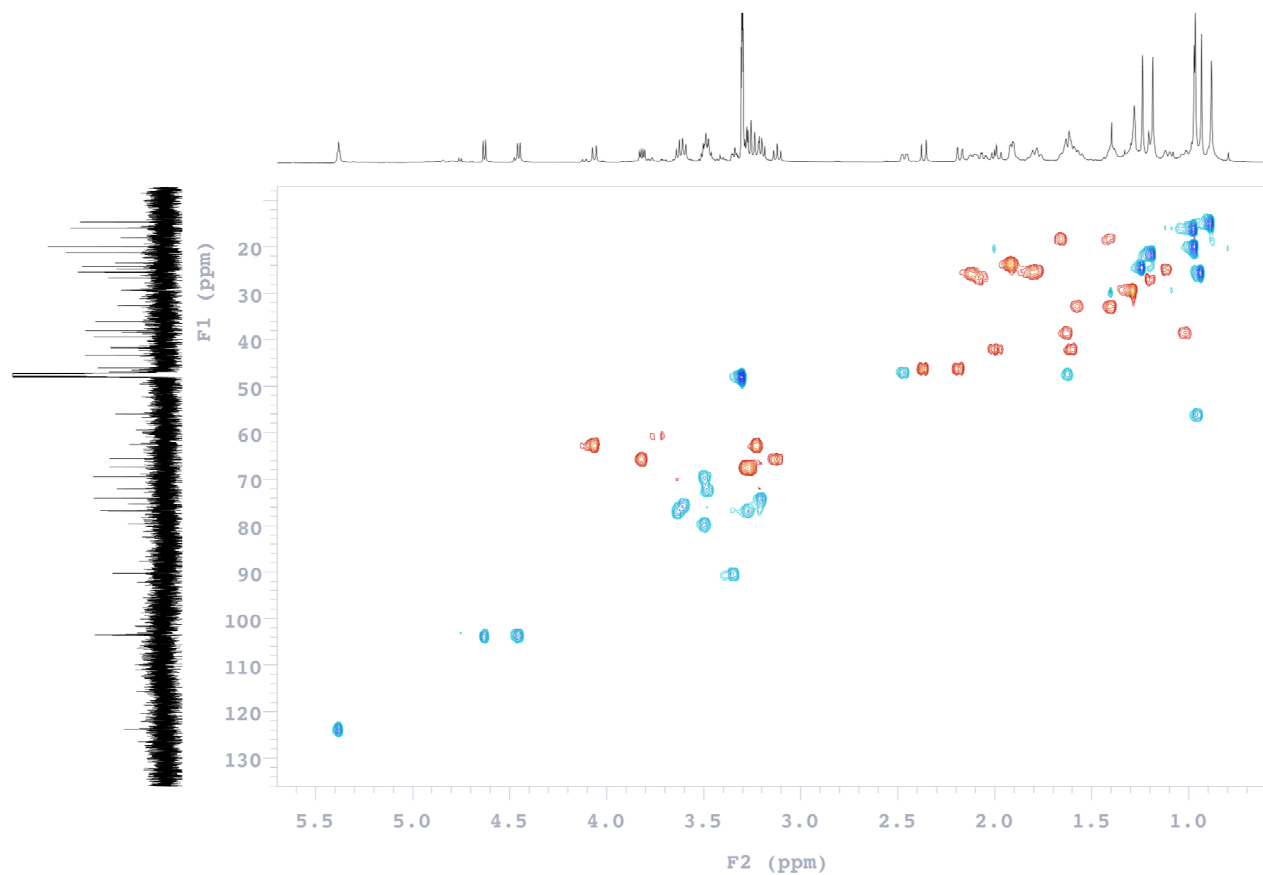

Figure S27 - HSQC spectrum of compound 2

Compound 2

Sample Name WSR224b  
Date collected 2021-02-24

Pulse sequence gHSQCAD  
Solvent cd3od

Temperature 27  
Spectrometer Agilent-NMR-inova600

Study owner npchem  
Operator npchem

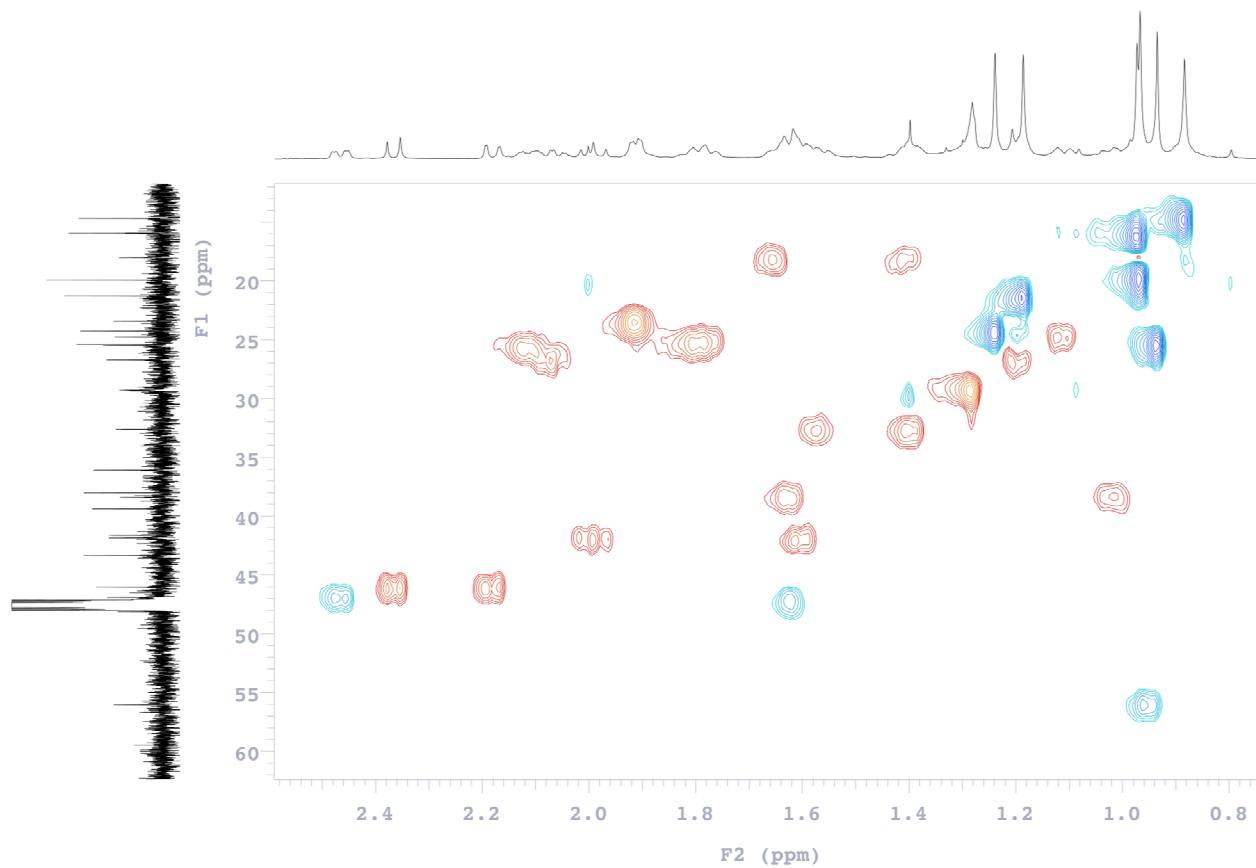

Data file exp

Plot date 2021-02-25

Figure S28 - HSQC spectrum of compound 2 zoomed-in (a)

Compound 2

Sample Name WSR224b  
Date collected 2021-02-24

Pulse sequence gHSQCAD  
Solvent cd3od

Temperature 27  
Spectrometer Agilent-NMR-inova600

Study owner npchem  
Operator npchem

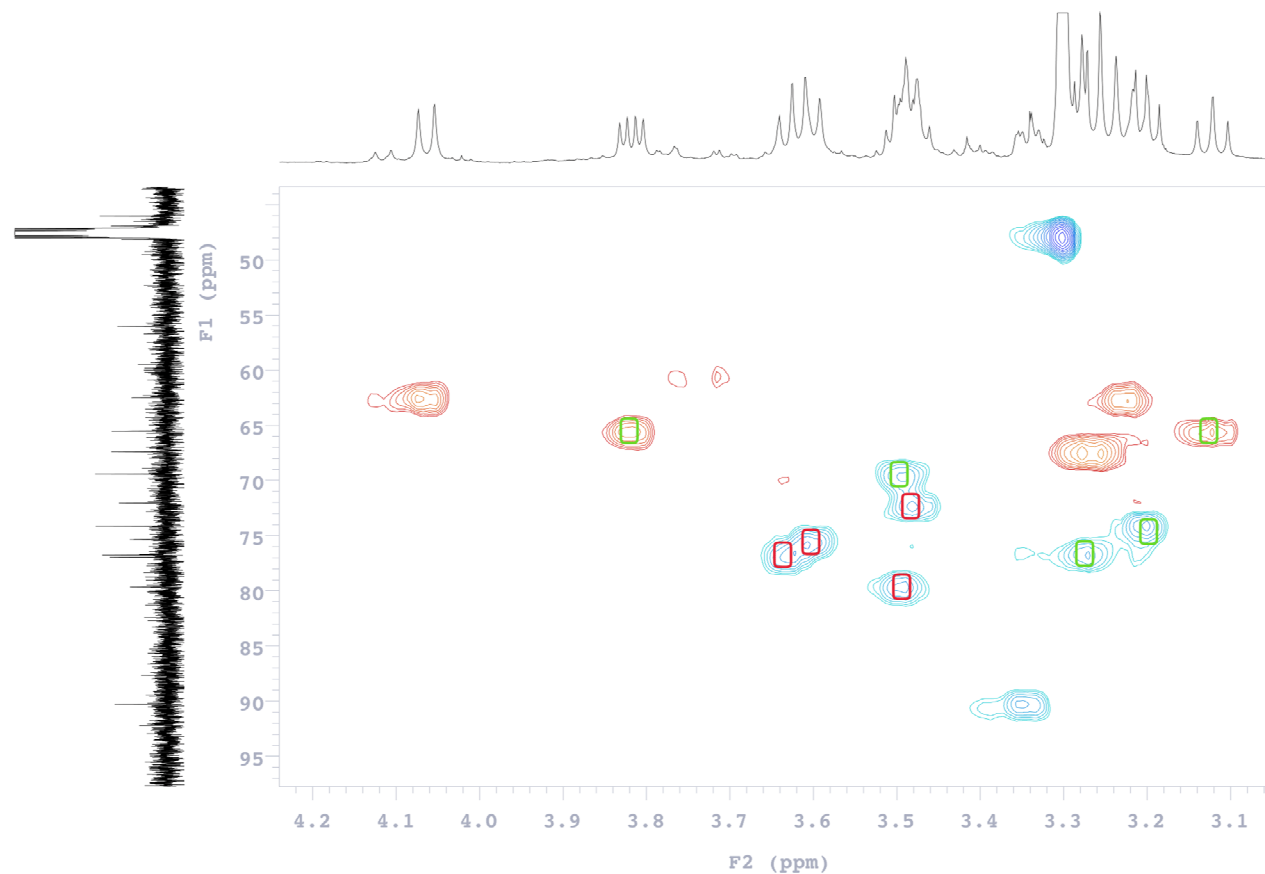

Data file exp

Plot date 2021-02-25

Figure S29- HSQC spectrum of compound 2 zoomed-in (b)

Compound 2

Sample Name **WSR224b**  
Date collected **2021-02-24**

Pulse sequence **gHSQCAD**  
Solvent **cd3od**

Temperature **27**  
Spectrometer **Agilent-NMR-inova600**

Study owner **npchem**  
Operator **npchem**

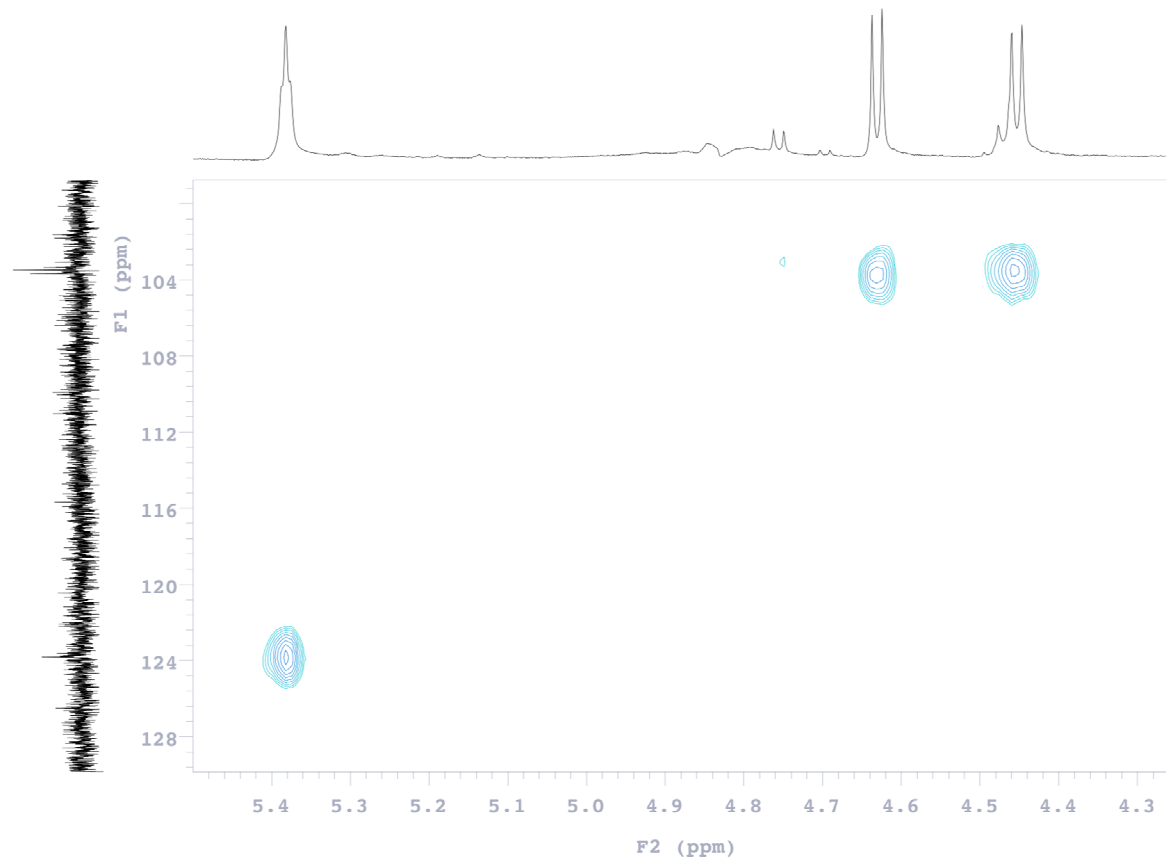

Data file exp

Plot date 2021-02-25

Figure S30 - HSQC spectrum of compound 2 zoomed-in (c)

Compound 2

Sample Name **WSR224b**  
Date collected **2021-02-24**

Pulse sequence **gHMBCAD**  
Solvent **cd3od**

Temperature **27**  
Spectrometer **Agilent-NMR-inova600**

Study owner **npchem**  
Operator **npchem**

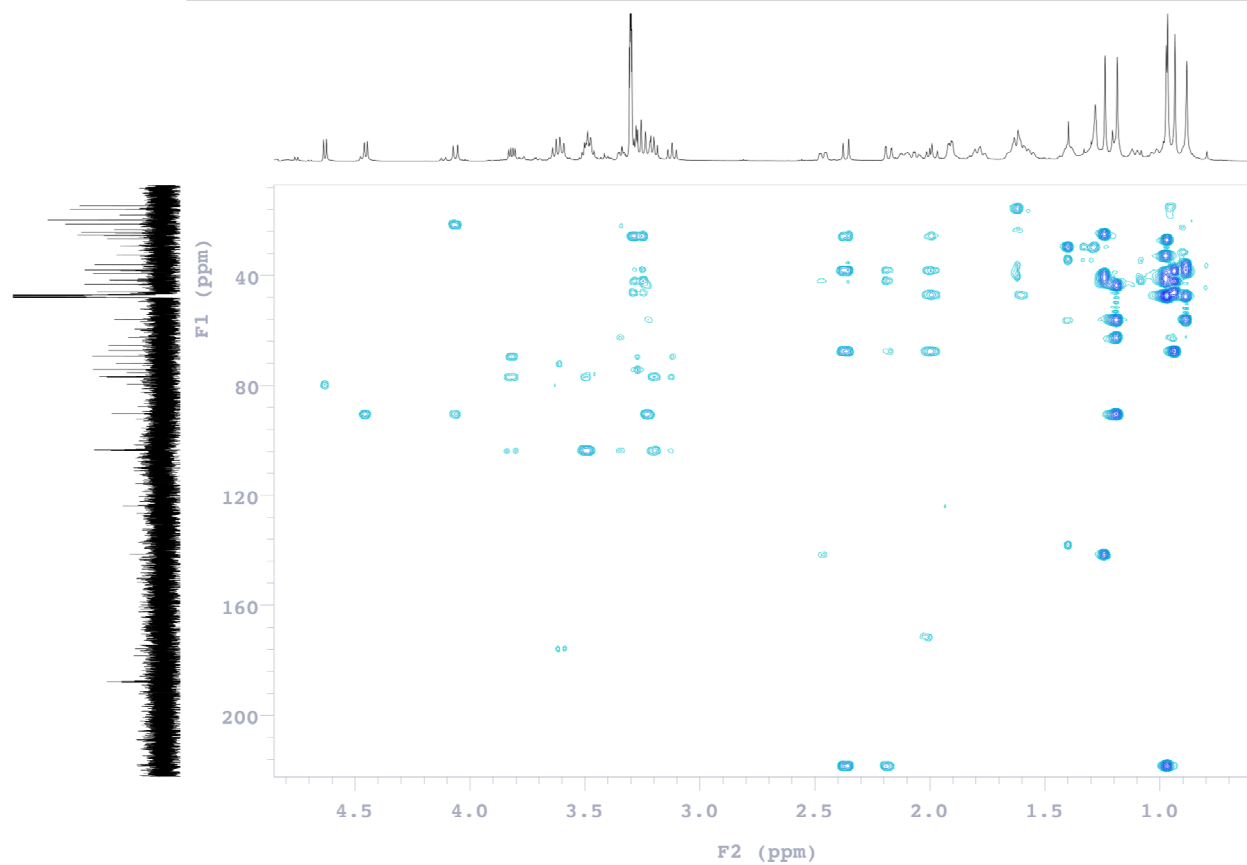

Figure S31 - HMBC spectrum of compound 2

Compound 2

Sample Name WSR224b  
Date collected 2021-02-24

Pulse sequence gHMBCAD  
Solvent cd3od

Temperature 27  
Spectrometer Agilent-NMR-inova600

Study owner npchem  
Operator npchem

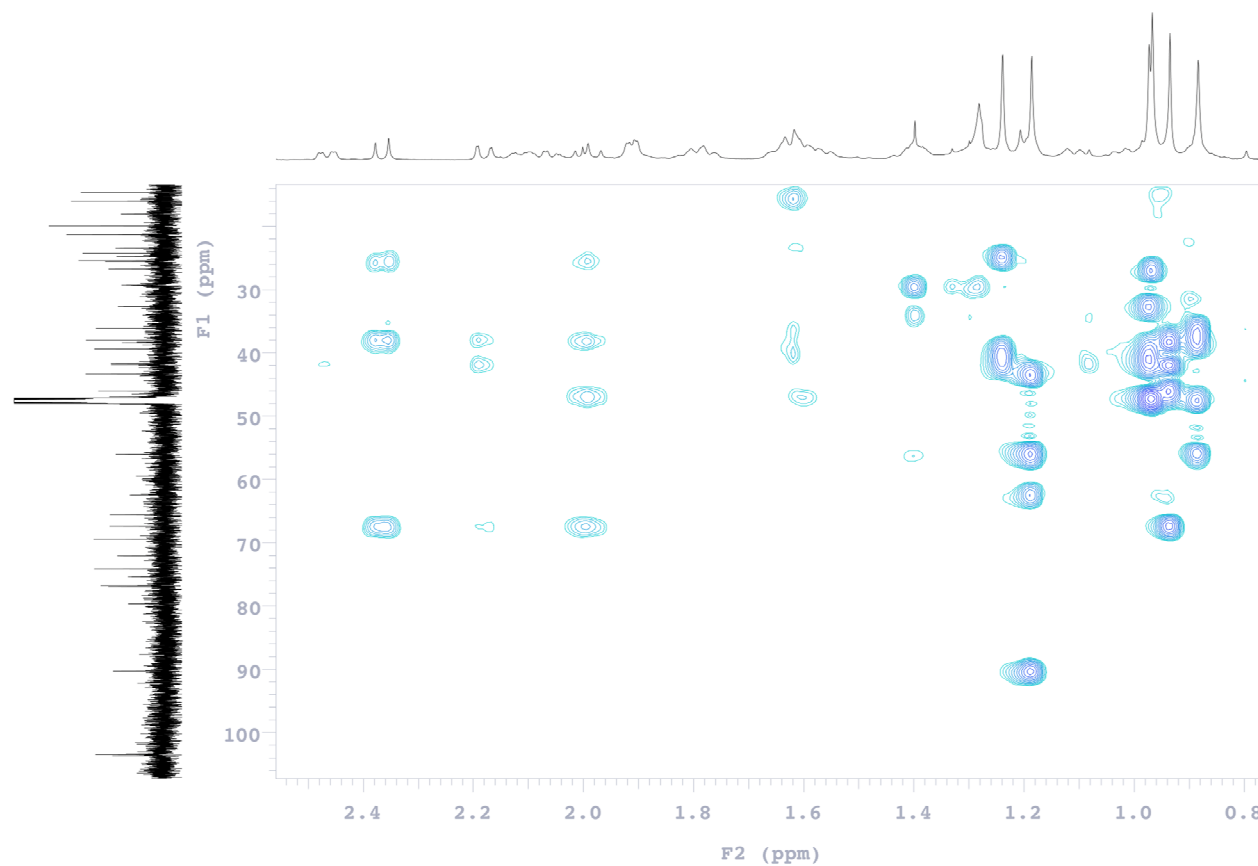

Data file exp

Plot date 2021-02-25

Figure S32 - HMBC spectrum of compound 2 zoomed-in (a)

Compound 2

Sample Name WSR224b  
Date collected 2021-02-24

Pulse sequence gHMBCAD  
Solvent cd3od

Temperature 27  
Spectrometer Agilent-NMR-inova600

Study owner npchem  
Operator npchem

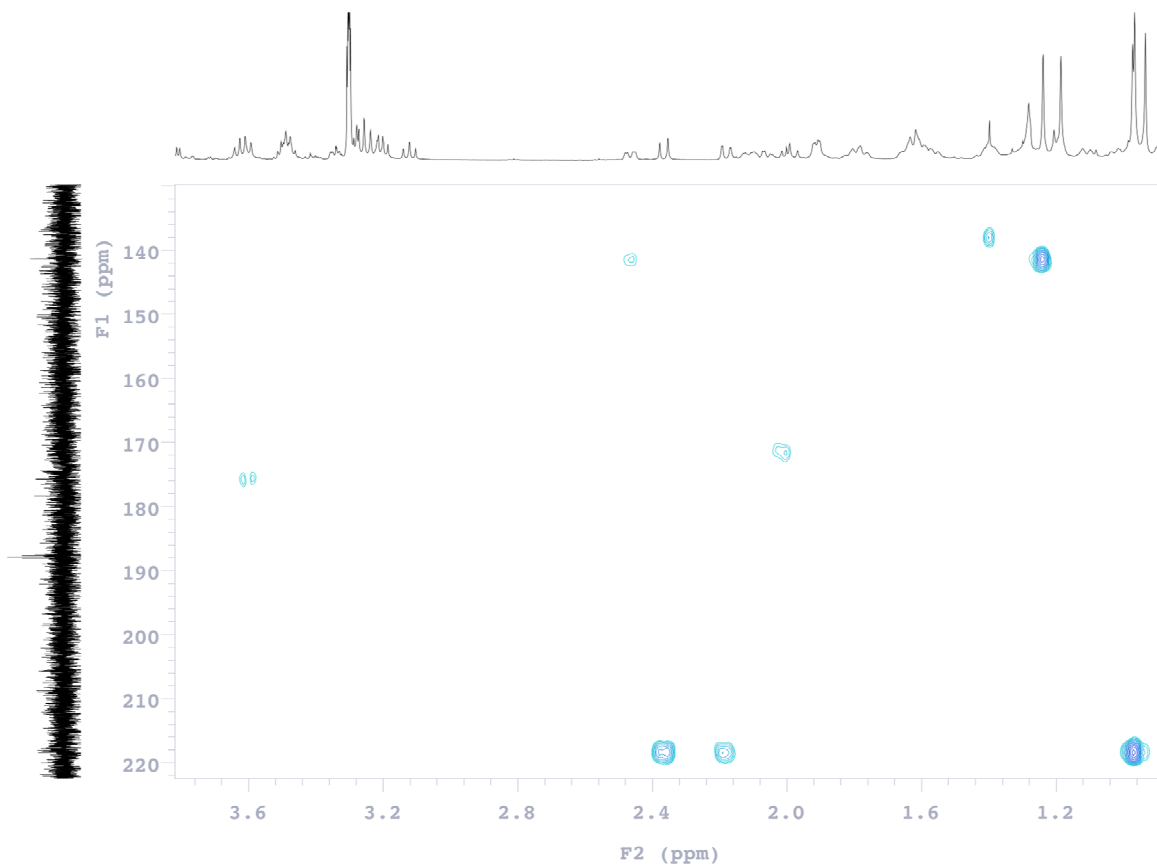

Figure S33 - HMBC spectrum of compound 2 zoomed-in (b)

Compound 2

|                |            |                |         |              |                      |             |        |
|----------------|------------|----------------|---------|--------------|----------------------|-------------|--------|
| Sample Name    | WSR224b    | Pulse sequence | gHMBCAD | Temperature  | 27                   | Study owner | npchem |
| Date collected | 2021-02-24 | Solvent        | cd3od   | Spectrometer | Agilent-NMR-inova600 | Operator    | npchem |

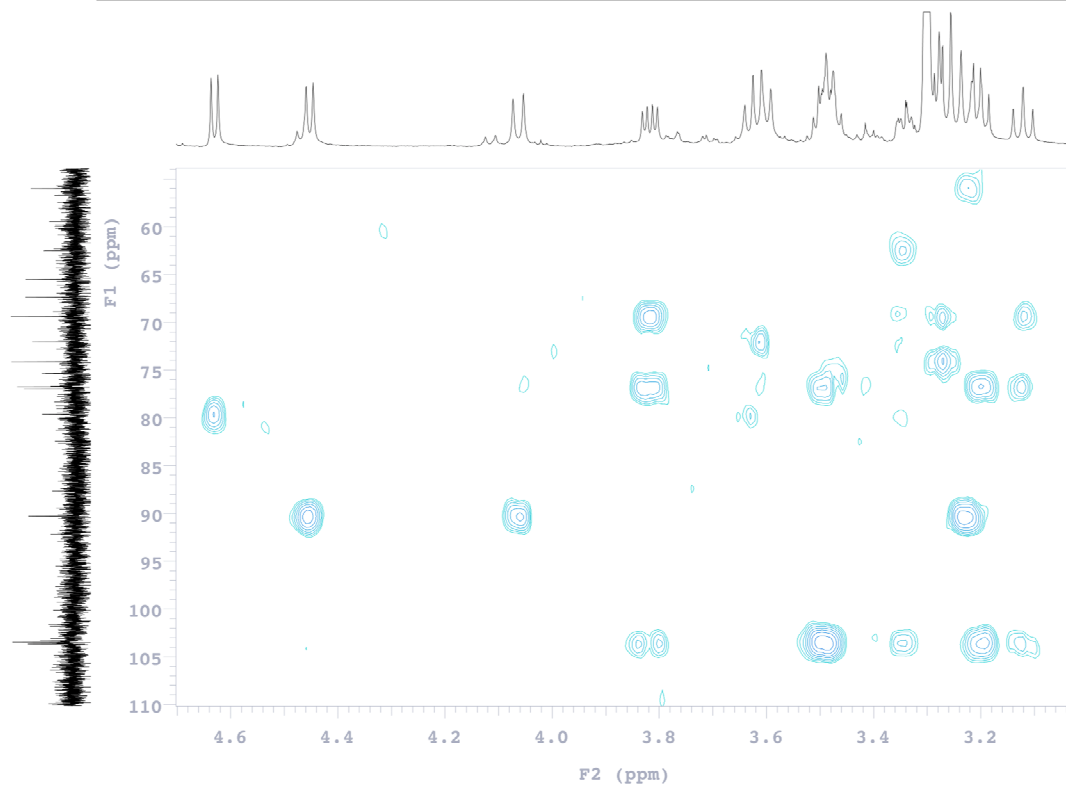

Figure S34 - HMBC spectrum of compound 2 zoomed-in (c)

**Compound 2**

Sample Name **WSR224b**  
Date collected **2021-02-24**

Pulse sequence **gCOSY**  
Solvent **cd3od**

Temperature **27**  
Spectrometer **Agilent-NMR-inova600**

Study owner **npchem**  
Operator **npchem**

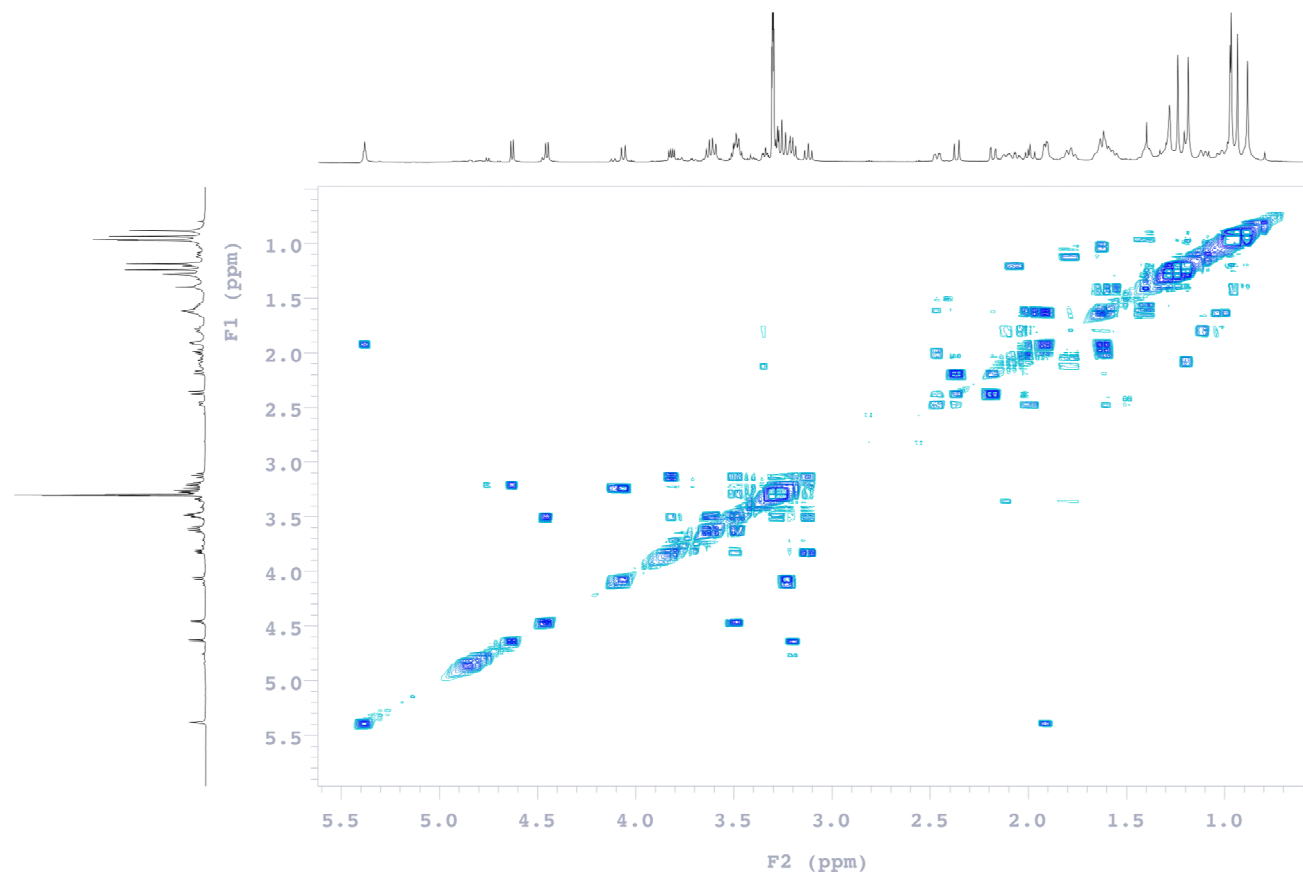

Data file exp

Plot date 2021-02-24

Figure S35 - COSY spectrum of compound 2

Compound 2

Sample Name **WSR224b**  
Date collected **2021-02-24**

Pulse sequence **gCOSY**  
Solvent **cd3od**

Temperature **27**  
Spectrometer **Agilent-NMR-inova600**

Study owner **npchem**  
Operator **npchem**

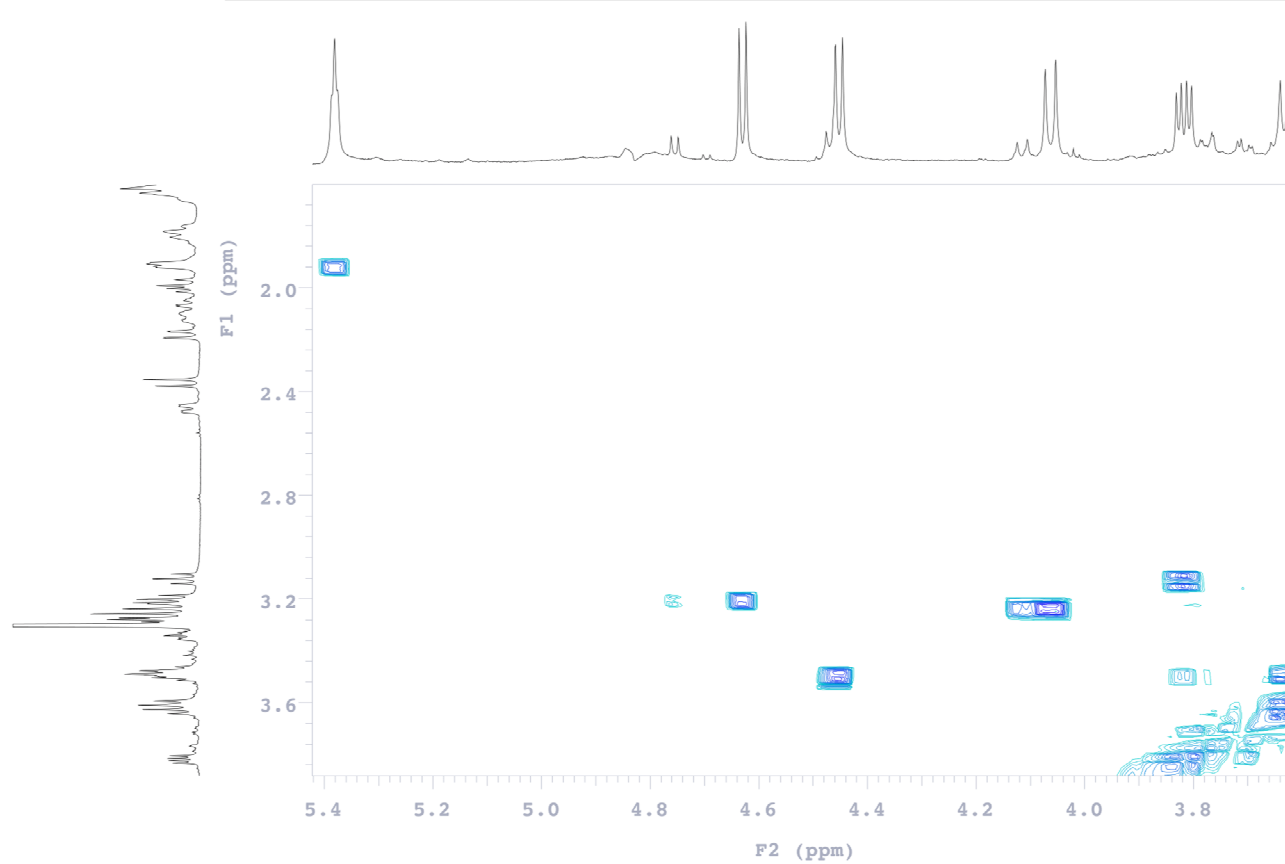

Data file exp

Plot date 2021-02-24

Figure S36 - COSY spectrum of compound 2 zoomed-in

Compound 2

Sample Name **WSR224b**  
Date collected **2021-02-24**

Pulse sequence **ROESYAD**  
Solvent **cd3od**

Temperature **27**  
Spectrometer **Agilent-NMR-inova600**

Study owner **npchem**  
Operator **npchem**

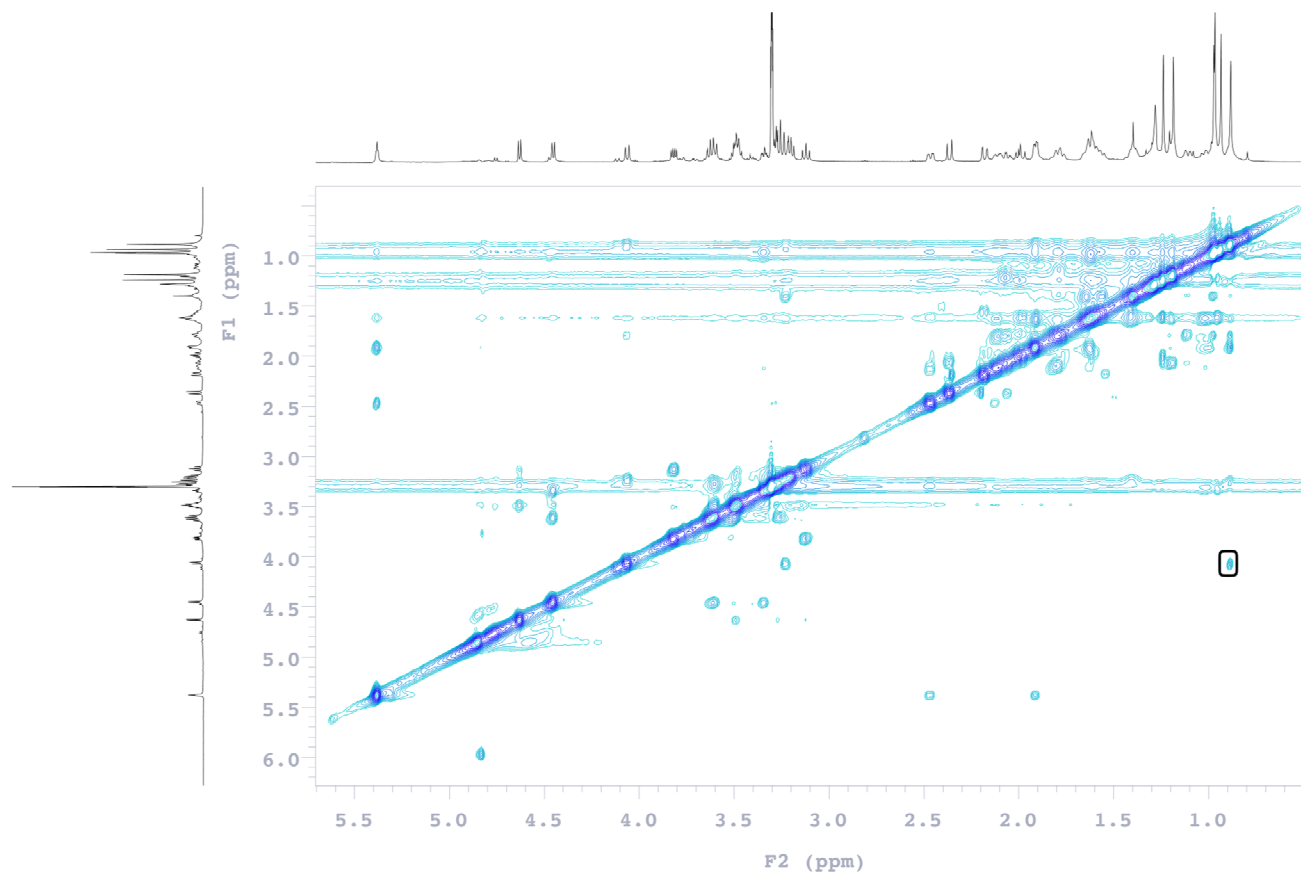

Data file exp

Plot date 2021-02-24

Figure S37 - ROESY spectrum of compound 2

Compound 2

Sample Name WSR224b  
Date collected 2021-02-24

Pulse sequence ROESYAD  
Solvent cd3od

Temperature 27  
Spectrometer Agilent-NMR-inova600

Study owner npchem  
Operator npchem

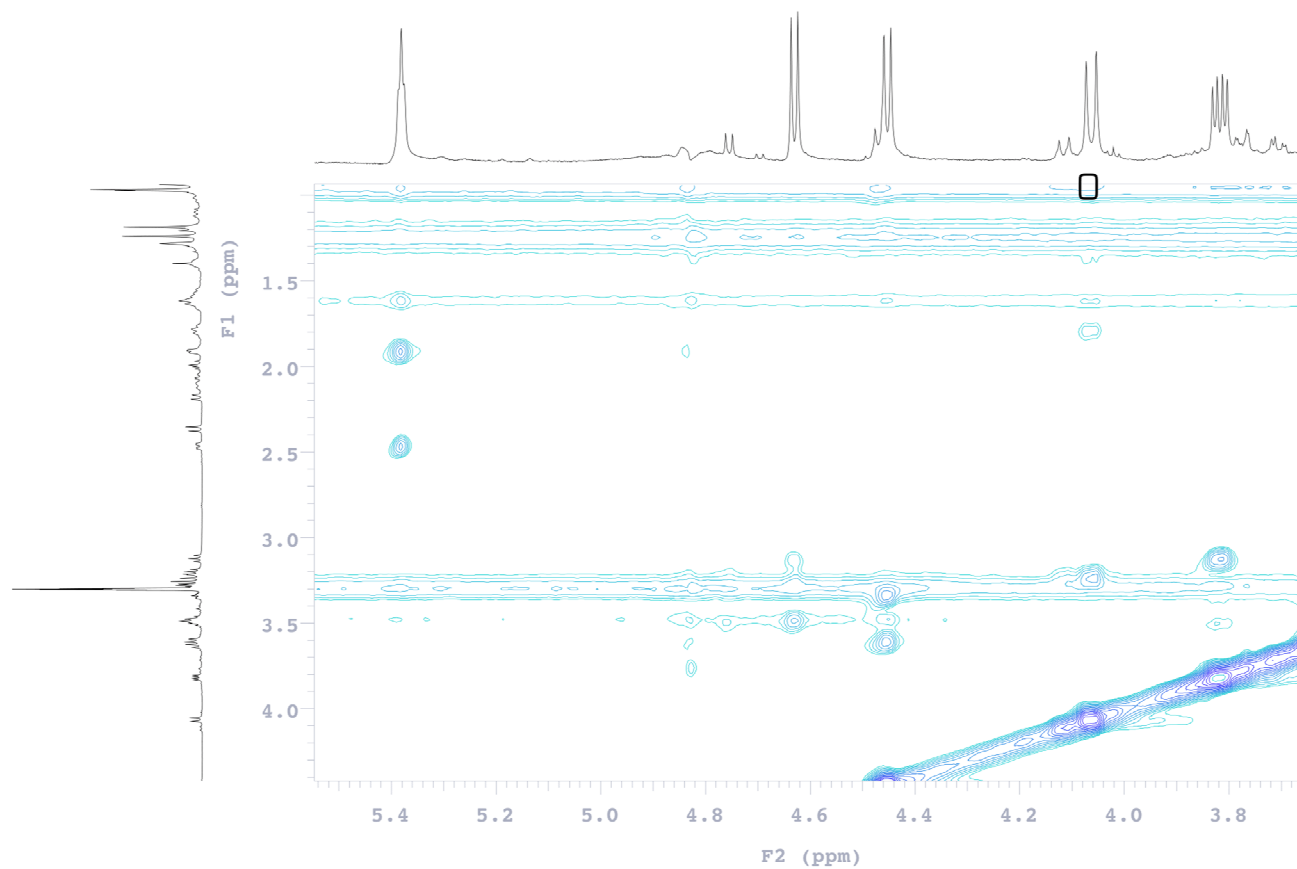

Data file exp

Plot date 2021-02-24

Figure S38 - ROESY spectrum of compound 2 zoomed-in
